# Supplementary material for: Genome-wide analysis of chromatin packing in Arabidopsis thaliana at single-gene resolution
Source: HighWire-hosted journal article supplement (doi:10.1101/gr.204032.116), 2016-05-25
Supplement: Supplemental_Table_S1.xlsx [file Supplemental_Table_S1.xlsx]

## Sheet: Sheet1
Number of Hi-C reads (statistics on mapping and PCR duplicates)
Sample	Total reads sequenced	Total mapped reads	Total mapped reads after removing PCR duplicates
DpnII, replicate 1	247618590	125236698	43850182
DpnII, replicate 2	239477694	143513115	97784686
DpnII, replicate 3	143406012	97378318	61714278
DpnII, replicate 4	160112293	102238028	63665502
Number of Hi-C reads (statistics on reads that finally retained after filtering)
Sample	Type of interaction			Total reads
	Intra-chromosomal (total)	Intra-chromosomal (between 2 to 25 kb)	Inter-chromosomal
DpnII, replicate 1	21015539	4839535	6174405	27189944
DpnII, replicate 2	49906141	11942837	14601361	64507502
DpnII, replicate 3	23442400	5646318	7000377	30442777
DpnII, replicate 4	30291444	6584902	9920368	40211812
