# Supplementary material for: Genome-wide analysis of chromatin packing in Arabidopsis thaliana at single-gene resolution
Source: HighWire-hosted journal article supplement (doi:10.1101/gr.204032.116), 2016-05-25
Supplement: Supplemental_Table_S4.xlsx [file Supplemental_Table_S4.xlsx]

## Sheet: Coupled genes (Expr. level 5-9)
gene_a	gene_b	expr_level_gene_a	expr_level_gene_b
AT1G19715	AT1G19740	8	9
AT3G17450	AT3G17465	7	9
AT4G24790	AT4G24800	5	7
AT4G24790	AT4G24805	5	7
AT4G35290	AT4G35300	5	7
AT5G45470	AT5G45480	7	7
AT5G45472	AT5G45480	7	7
AT1G09570	AT1G09575	7	5
AT1G79520	AT1G79530	6	8
AT4G00740	AT4G00750	8	7
AT1G24280	AT1G24300	8	6
AT1G52618	AT1G52640	5	5
AT1G52620	AT1G52640	5	5
AT1G80420	AT1G80440	5	7
AT1G04920	AT1G04930	5	5
AT1G70550	AT1G70560	6	8
AT1G01390	AT1G01420	6	7
AT5G13010	AT5G13020	8	9
AT1G23280	AT1G23310	9	9
AT1G23290	AT1G23310	9	9
AT3G02500	AT3G02515	5	5
AT1G04510	AT1G04530	8	8
AT3G26830	AT3G26840	5	6
AT1G72650	AT1G72670	6	7
AT2G25970	AT2G25980	9	5
AT3G49180	AT3G49210	8	5
AT4G26410	AT4G26430	9	7
AT5G11280	AT5G11300	8	5
AT5G04280	AT5G04290	8	7
AT5G44740	AT5G44750	5	7
AT5G42080	AT5G42090	9	9
AT5G42080	AT5G42092	9	8
AT2G20320	AT2G20330	6	8
AT1G02720	AT1G02730	6	8
AT5G49530	AT5G49555	7	8
AT2G48010	AT2G48030	5	6
AT5G27240	AT5G27270	6	8
AT2G43400	AT2G43410	7	6
AT5G46120	AT5G46150	5	6
AT3G04790	AT3G04810	9	7
AT4G14330	AT4G14340	7	8
AT2G42520	AT2G42540	9	9
AT4G34220	AT4G34230	8	7
AT2G37630	AT2G37640	9	9
AT1G35340	AT1G35350	8	7
AT5G12870	AT5G12890	5	7
AT2G34070	AT2G34080	7	5
AT5G02750	AT5G02760	5	7
AT5G02750	AT5G02770	5	9
AT2G45340	AT2G45380	8	7
AT4G23640	AT4G23650	8	9
AT1G27180	AT1G27190	5	8
AT4G27620	AT4G27630	7	5
AT5G11000	AT5G11010	8	6
AT1G10510	AT1G10520	9	5
AT1G20380	AT1G20390	6	6
AT1G72175	AT1G72180	7	8
AT1G73360	AT1G73370	5	5
AT2G35635	AT2G35650	9	7
AT4G27585	AT4G27595	8	7
AT5G27400	AT5G27420	7	5
AT1G27940	AT1G27950	5	9
AT4G31850	AT4G31860	9	6
AT1G79950	AT1G79960	7	6
AT1G05500	AT1G05520	8	8
AT2G20690	AT2G20720	9	5
AT5G42650	AT5G42660	9	7
AT5G48310	AT5G48320	6	5
AT1G72390	AT1G72410	7	7
AT3G62130	AT3G62150	8	6
AT5G02502	AT5G02530	8	9
AT3G09030	AT3G09040	7	5
AT4G19180	AT4G19190	7	7
AT4G26080	AT4G26090	9	5
AT4G26080	AT4G26095	9	5
AT5G04040	AT5G04050	7	5
AT3G04070	AT3G04080	5	8
AT2G46100	AT2G46140	9	6
AT2G46100	AT2G46150	9	5
AT2G46110	AT2G46140	7	6
AT2G46110	AT2G46150	7	5
AT1G27460	AT1G27470	8	8
AT3G62580	AT3G62600	9	9
AT4G30780	AT4G30790	7	7
AT1G14180	AT1G14190	6	5
AT5G16110	AT5G16120	8	7
AT1G23820	AT1G23860	9	6
AT5G14690	AT5G14700	5	7
AT3G07300	AT3G07320	7	8
AT1G32740	AT1G32750	5	7
AT2G24520	AT2G24530	7	5
AT4G18905	AT4G18910	8	7
AT4G11830	AT4G11840	7	6
AT1G06560	AT1G06580	7	5
AT5G17640	AT5G17650	7	7
AT5G64010	AT5G64030	6	9
AT5G64020	AT5G64030	7	9
AT2G20900	AT2G20920	6	9
AT5G10370	AT5G10380	6	6
AT3G17840	AT3G17850	8	8
AT2G46735	AT2G46750	7	5
AT5G65670	AT5G65683	9	7
AT4G12710	AT4G12730	6	9
AT1G75020	AT1G75040	5	8
AT1G30700	AT1G30720	5	6
AT1G16220	AT1G16240	6	7
AT5G63770	AT5G63780	6	9
AT5G63770	AT5G63790	6	9
AT3G03300	AT3G03305	5	7
AT4G01280	AT4G01290	6	8
AT4G39940	AT4G39950	9	9
AT1G74240	AT1G74260	6	9
AT5G04230	AT5G04235	7	5
AT3G15350	AT3G15356	6	8
AT3G15354	AT3G15356	8	8
AT3G17630	AT3G17650	5	8
AT4G26970	AT4G26980	9	7
AT5G57580	AT5G57590	8	7
AT1G56000	AT1G56020	7	6
AT1G56010	AT1G56020	5	6
AT5G65780	AT5G65790	8	5
AT5G20935	AT5G20950	9	8
AT4G11270	AT4G11280	8	6
AT2G47980	AT2G47990	8	8
AT1G18690	AT1G18700	5	6
AT1G21660	AT1G21670	8	8
AT4G24680	AT4G24690	8	9
AT3G08943	AT3G08947	8	7
AT1G65580	AT1G65590	8	7
AT1G23870	AT1G23890	6	5
AT2G24260	AT2G24270	5	9
AT2G17790	AT2G17800	8	8
AT5G11380	AT5G11410	6	5
AT5G02250	AT5G02260	8	7
AT1G55930	AT1G55960	7	7
AT5G49880	AT5G49890	7	8
AT4G32040	AT4G32050	8	7
AT4G32040	AT4G32060	8	9
AT1G04300	AT1G04310	6	5
AT1G02000	AT1G02020	6	6
AT1G06400	AT1G06410	9	9
AT2G35350	AT2G35360	6	7
AT3G04740	AT3G04750	7	6
AT3G21280	AT3G21290	7	6
AT3G18035	AT3G18040	9	7
AT4G33410	AT4G33430	7	7
AT4G12010	AT4G12020	6	5
AT5G38660	AT5G38690	9	8
AT1G56570	AT1G56590	6	7
AT4G01060	AT4G01080	5	8
AT4G01290	AT4G01310	8	9
AT3G08550	AT3G08570	8	5
AT5G58960	AT5G58980	7	6
AT1G20140	AT1G20160	7	5
AT3G02170	AT3G02180	7	9
AT2G30820	AT2G30840	5	5
AT4G32200	AT4G32208	5	7
AT1G79560	AT1G79570	9	8
AT4G16370	AT4G16380	9	9
AT2G47310	AT2G47330	6	8
AT5G43920	AT5G43930	7	5
AT5G52630	AT5G52650	5	9
AT1G79050	AT1G79070	8	7
AT1G26520	AT1G26540	7	5
AT1G16390	AT1G16410	6	9
AT2G40840	AT2G40860	9	7
AT2G40840	AT2G40880	9	9
AT2G40850	AT2G40860	5	7
AT2G40850	AT2G40880	5	9
AT5G66120	AT5G66140	9	9
AT1G50270	AT1G50300	6	7
AT1G08050	AT1G08060	5	5
AT3G63240	AT3G63250	5	7
AT5G19220	AT5G19240	9	8
AT5G19221	AT5G19240	5	8
AT2G01820	AT2G01830	9	6
AT3G48860	AT3G48870	6	9
AT4G30440	AT4G30460	9	5
AT1G26830	AT1G26850	9	9
AT5G64250	AT5G64260	7	8
AT4G00380	AT4G00400	6	8
AT2G22720	AT2G22740	7	6
AT3G14172	AT3G14180	7	8
AT3G01780	AT3G01800	8	7
AT1G64710	AT1G64740	8	7
AT3G50740	AT3G50750	9	7
AT5G26180	AT5G26210	7	9
AT3G58560	AT3G58570	9	8
AT1G77460	AT1G77470	5	8
AT1G55510	AT1G55530	7	8
AT3G20430	AT3G20440	8	7
AT4G34100	AT4G34110	8	9
AT2G27150	AT2G27170	6	7
AT2G17350	AT2G17370	8	6
AT4G14300	AT4G14310	8	6
AT3G06340	AT3G06350	5	9
AT4G37380	AT4G37390	6	5
AT5G08440	AT5G08450	6	7
AT5G67290	AT5G67300	8	8
AT1G74810	AT1G74840	6	8
AT1G30450	AT1G30460	6	7
AT3G09770	AT3G09780	7	5
AT5G59570	AT5G59600	6	5
AT2G42040	AT2G42070	7	9
AT1G29980	AT1G30000	7	7
AT3G63370	AT3G63380	6	5
AT1G07890	AT1G07901	9	5
AT3G26020	AT3G26050	6	6
AT1G07119	AT1G07140	5	9
AT4G03070	AT4G03080	7	8
AT3G62890	AT3G62900	5	7
AT3G47450	AT3G47460	8	6
AT4G35890	AT4G35900	9	5
AT4G03400	AT4G03415	9	7
AT5G20250	AT5G20270	7	8
AT3G14790	AT3G14810	8	6
AT4G27260	AT4G27270	6	7
AT1G20050	AT1G20060	9	5
AT5G43460	AT5G43470	9	8
AT4G02560	AT4G02570	6	8
AT2G01610	AT2G01630	7	7
AT1G17110	AT1G17120	7	7
AT5G07970	AT5G07980	7	7
AT1G64980	AT1G64990	9	7
AT5G27730	AT5G27750	8	6
AT5G65540	AT5G65560	7	6
AT4G25710	AT4G25730	6	9
AT1G07840	AT1G07870	7	5
AT1G19850	AT1G19870	7	8
AT4G17760	AT4G17770	5	9
AT5G15300	AT5G15310	5	7
AT3G27210	AT3G27220	7	6
AT2G19110	AT2G19120	7	5
AT1G68980	AT1G68990	6	7
AT1G71480	AT1G71528	9	5
AT1G71480	AT1G71530	9	5
AT1G71490	AT1G71528	6	5
AT1G71490	AT1G71530	6	5
AT3G51150	AT3G51160	6	9
AT1G34200	AT1G34210	7	8
AT1G34200	AT1G34220	7	7
AT1G75840	AT1G75850	9	7
AT1G34360	AT1G34370	7	7
AT5G66820	AT5G66850	7	8
AT2G37560	AT2G37585	5	7
AT2G37570	AT2G37585	7	7
AT4G28660	AT4G28680	9	5
AT5G14210	AT5G14220	8	8
AT5G64430	AT5G64440	7	8
AT1G07930	AT1G07940	9	9
AT2G06040	AT2G06050	6	7
AT5G35160	AT5G35170	8	9
AT5G09860	AT5G09870	7	9
AT4G22710	AT4G22730	9	6
AT3G55460	AT3G55480	9	7
AT1G30640	AT1G30650	6	5
AT2G01460	AT2G01470	5	8
AT1G15030	AT1G15060	8	7
AT3G06370	AT3G06380	5	8
AT3G54230	AT3G54250	7	7
AT1G23020	AT1G23030	9	7
AT4G14580	AT4G14590	6	5
AT1G62330	AT1G62350	8	6
AT1G70610	AT1G70620	8	7
AT1G06660	AT1G06670	5	8
AT3G18860	AT3G18870	8	7
AT5G08550	AT5G08560	7	7
AT5G61160	AT5G61190	5	6
AT5G65930	AT5G65940	6	8
AT1G26120	AT1G26130	8	6
AT5G12920	AT5G12940	5	6
AT3G18100	AT3G18110	5	8
AT1G71020	AT1G71040	7	8
AT3G57610	AT3G57630	9	5
AT5G58520	AT5G58540	6	5
AT1G05810	AT1G05830	6	6
AT3G26560	AT3G26570	8	9
AT4G00340	AT4G00355	8	6
AT3G59550	AT3G59570	6	6
AT3G51830	AT3G51840	7	9
AT2G16890	AT2G16900	5	6
AT5G09590	AT5G09620	9	9
AT1G76070	AT1G76100	5	9
AT1G76080	AT1G76100	9	9
AT3G17350	AT3G17360	7	6
AT5G67530	AT5G67550	8	5
AT5G01200	AT5G01215	5	6
AT5G01200	AT5G01210	5	6
AT5G63590	AT5G63610	5	7
AT5G01960	AT5G01980	8	7
AT5G01960	AT5G01990	8	7
AT5G56250	AT5G56260	6	9
AT1G20840	AT1G20850	8	8
AT3G56960	AT3G56990	6	8
AT5G64060	AT5G64070	5	8
AT3G27640	AT3G27650	6	5
AT1G75750	AT1G75760	9	7
AT1G18450	AT1G18460	8	7
AT5G50310	AT5G50320	9	8
AT5G50310	AT5G50330	9	5
AT4G30100	AT4G30110	8	6
AT3G14160	AT3G14172	6	7
AT3G01750	AT3G01770	6	7
AT3G01750	AT3G01780	6	8
AT3G27280	AT3G27300	8	8
AT2G20180	AT2G20190	6	8
AT2G46620	AT2G46630	6	8
AT4G01370	AT4G01400	9	7
AT3G06570	AT3G06590	6	7
AT3G22370	AT3G22380	9	9
AT4G00930	AT4G00940	6	5
AT2G38840	AT2G38860	7	7
AT1G08845	AT1G08880	6	9
AT4G26540	AT4G26550	8	7
AT4G26542	AT4G26550	7	7
AT5G63020	AT5G63040	7	7
AT1G01950	AT1G01960	5	8
AT1G13160	AT1G13170	8	7
AT5G12920	AT5G12930	5	6
AT4G34450	AT4G34460	9	7
AT2G45920	AT2G45950	6	6
AT3G09780	AT3G09800	5	8
AT5G15200	AT5G15220	9	8
AT2G46020	AT2G46030	7	8
AT5G17790	AT5G17800	8	5
AT5G53350	AT5G53370	9	7
AT5G19400	AT5G19420	7	5
AT5G14720	AT5G14730	9	5
AT1G60670	AT1G60700	6	6
AT4G24120	AT4G24140	7	5
AT1G74510	AT1G74540	7	5
AT3G27230	AT3G27250	9	5
AT1G11400	AT1G11420	6	5
AT4G22285	AT4G22290	8	8
AT4G00820	AT4G00840	6	7
AT5G59420	AT5G59430	8	5
AT5G45370	AT5G45390	5	9
AT1G15230	AT1G15250	8	9
AT1G15230	AT1G15260	8	9
AT2G39310	AT2G39330	8	5
AT5G53430	AT5G53440	6	8
AT1G09960	AT1G09970	6	8
AT2G38010	AT2G38020	7	7
AT2G20240	AT2G20250	7	5
AT1G17350	AT1G17360	6	8
AT1G64140	AT1G64150	8	9
AT1G64142	AT1G64150	8	9
AT1G05420	AT1G05440	5	5
AT1G76730	AT1G76760	9	5
AT4G03110	AT4G03115	7	6
AT1G16220	AT1G16250	6	6
AT2G36960	AT2G36980	5	5
AT2G39810	AT2G39830	8	5
AT4G36700	AT4G36710	6	7
AT3G61610	AT3G61630	7	6
AT2G44140	AT2G44150	6	7
AT2G44130	AT2G44150	5	7
AT3G57765	AT3G57785	6	9
AT3G57770	AT3G57785	6	9
AT1G01900	AT1G01920	6	6
AT3G57190	AT3G57220	8	8
AT3G13682	AT3G13690	5	8
AT3G24070	AT3G24090	7	6
AT1G20920	AT1G20930	7	8
AT5G08300	AT5G08310	9	5
AT1G23030	AT1G23040	7	6
AT5G60300	AT5G60335	5	5
AT5G10530	AT5G10540	6	9
AT5G10530	AT5G10550	6	9
AT1G16610	AT1G16630	8	6
AT1G29340	AT1G29350	8	9
AT1G72320	AT1G72340	6	8
AT3G17800	AT3G17820	8	9
AT1G03920	AT1G03940	5	8
AT3G54860	AT3G54880	7	8
AT2G38370	AT2G38390	6	6
AT1G80130	AT1G80150	6	6
AT4G24450	AT4G24460	7	7
AT3G14360	AT3G14370	5	5
AT3G56150	AT3G56160	9	9
AT4G16960	AT4G16970	5	6
AT1G72280	AT1G72300	5	6
AT4G27710	AT4G27730	8	6
AT2G16390	AT2G16405	6	7
AT5G64341	AT5G64360	7	5
AT5G64342	AT5G64360	7	5
AT5G64340	AT5G64360	7	5
AT5G64343	AT5G64360	7	5
AT3G53260	AT3G53270	9	5
AT2G43420	AT2G43445	7	5
AT2G43430	AT2G43445	6	5
AT3G55090	AT3G55110	5	6
AT1G13030	AT1G13050	7	5
AT3G26540	AT3G26560	6	8
AT1G11260	AT1G11270	8	5
AT4G02750	AT4G02760	6	5
AT1G33240	AT1G33250	9	7
AT1G80000	AT1G80020	7	8
AT5G64320	AT5G64341	6	7
AT5G64320	AT5G64342	6	7
AT5G64320	AT5G64340	6	7
AT5G64320	AT5G64343	6	7
AT1G72530	AT1G72550	5	8
AT5G51670	AT5G51690	5	7
AT3G55980	AT3G56000	7	5
AT4G38430	AT4G38460	9	9
AT1G78770	AT1G78790	6	7
AT3G63370	AT3G63390	6	7
AT4G30860	AT4G30870	6	5
AT1G35510	AT1G35516	7	8
AT1G31910	AT1G31930	9	6
AT3G51110	AT3G51120	6	7
AT3G49660	AT3G49670	7	9
AT5G58040	AT5G58060	8	8
AT5G58040	AT5G58070	8	9
AT3G08760	AT3G08770	7	9
AT4G28570	AT4G28590	7	8
AT5G65020	AT5G65050	8	7
AT3G13300	AT3G13310	8	8
AT5G19220	AT5G19250	9	9
AT5G19221	AT5G19250	5	9
AT5G08200	AT5G08230	7	6
AT4G36580	AT4G36610	6	5
AT5G67280	AT5G67290	8	8
AT3G20240	AT3G20260	8	7
AT5G08510	AT5G08530	6	9
AT4G16430	AT4G16444	8	7
AT1G03090	AT1G03100	6	6
AT3G10340	AT3G10360	5	8
AT1G75230	AT1G75240	6	8
AT5G04220	AT5G04230	5	7
AT3G17110	AT3G17130	5	6
AT4G17490	AT4G17500	5	6
AT3G11590	AT3G11620	8	5
AT3G11591	AT3G11620	5	5
AT3G04690	AT3G04710	6	6
AT5G61140	AT5G61150	6	8
AT4G01950	AT4G01960	8	8
AT4G19150	AT4G19160	7	8
AT3G05530	AT3G05545	9	8
AT5G60250	AT5G60280	5	6
AT5G23430	AT5G23440	6	9
AT2G40230	AT2G40240	6	5
AT5G18520	AT5G18525	9	7
AT3G07260	AT3G07270	5	8
AT1G06650	AT1G06670	8	8
AT5G16340	AT5G16370	5	7
AT2G29180	AT2G29200	9	7
AT2G29190	AT2G29200	7	7
AT4G02990	AT4G03010	9	6
AT1G57770	AT1G57790	9	6
AT3G13100	AT3G13120	5	9
AT1G65450	AT1G65470	5	6
AT2G31820	AT2G31840	8	9
AT4G16390	AT4G16430	9	8
AT4G16400	AT4G16430	9	8
AT1G02920	AT1G02950	9	5
AT5G13660	AT5G13680	5	7
AT1G76160	AT1G76170	9	6
AT1G23380	AT1G23390	5	9
AT1G64570	AT1G64580	7	6
AT1G64570	AT1G64583	7	5
AT2G39350	AT2G39360	5	7
AT2G29140	AT2G29165	8	5
AT5G03780	AT5G03790	5	5
AT1G52420	AT1G52430	8	5
AT3G12020	AT3G12030	7	7
AT3G57570	AT3G57580	6	5
AT4G03550	AT4G03560	8	9
AT1G70290	AT1G70300	7	6
AT4G11660	AT4G11670	6	6
AT5G54960	AT5G55000	9	6
AT1G79000	AT1G79010	7	9
AT2G25420	AT2G25430	6	9
AT5G50400	AT5G50420	7	7
AT1G15950	AT1G15970	8	7
AT1G15960	AT1G15970	7	7
AT3G04230	AT3G04240	7	8
AT1G27480	AT1G27500	9	6
AT3G06810	AT3G06830	8	5
AT2G28250	AT2G28260	5	6
AT3G54280	AT3G54290	7	7
AT5G02560	AT5G02590	7	8
AT2G47750	AT2G47760	5	6
AT2G26780	AT2G26790	7	5
AT3G10960	AT3G10970	6	9
AT4G32660	AT4G32680	7	7
AT1G53700	AT1G53710	5	6
AT1G53700	AT1G53720	5	7
AT5G19900	AT5G19920	8	6
AT1G22870	AT1G22880	6	5
AT3G21755	AT3G21780	8	5
AT3G21760	AT3G21780	8	5
AT3G26560	AT3G26580	8	9
AT2G44910	AT2G44920	5	8
AT5G47480	AT5G47490	8	7
AT1G65820	AT1G65840	8	9
AT1G65820	AT1G65845	8	8
AT5G62180	AT5G62210	6	9
AT4G33380	AT4G33400	8	7
AT3G17430	AT3G17450	8	7
AT3G14890	AT3G14920	6	7
AT3G51290	AT3G51310	6	8
AT4G38225	AT4G38240	8	6
AT5G15010	AT5G15020	6	7
AT1G79010	AT1G79030	9	7
AT4G28490	AT4G28510	6	9
AT4G30920	AT4G30935	9	7
AT3G56650	AT3G56680	9	9
AT1G67560	AT1G67580	7	7
AT4G02020	AT4G02030	8	7
AT4G02020	AT4G02040	8	6
AT2G17420	AT2G17440	9	7
AT3G47810	AT3G47820	8	7
AT1G51580	AT1G51600	7	6
AT1G67310	AT1G67320	7	6
AT1G67310	AT1G67325	7	7
AT3G05040	AT3G05050	7	8
AT2G25510	AT2G25530	9	6
AT3G12520	AT3G12550	6	6
AT3G06270	AT3G06290	7	7
AT5G16610	AT5G16620	6	9
AT2G20760	AT2G20790	9	6
AT4G18780	AT4G18800	6	8
AT5G51570	AT5G51590	9	6
AT3G18230	AT3G18260	7	5
AT1G02690	AT1G02720	7	6
AT4G09020	AT4G09030	9	8
AT3G13965	AT3G13980	5	6
AT3G51580	AT3G51600	6	9
AT1G51570	AT1G51590	9	7
AT2G02026	AT2G02040	5	8
AT1G06220	AT1G06230	8	7
AT4G24040	AT4G24050	5	5
AT3G10800	AT3G10820	7	5
AT5G25060	AT5G25070	8	7
AT3G25585	AT3G25590	6	6
AT1G48460	AT1G48480	9	9
AT5G10370	AT5G10390	6	9
AT4G27880	AT4G27900	7	7
AT4G00355	AT4G00360	6	9
AT1G50120	AT1G50140	8	7
AT1G26270	AT1G26300	8	7
AT5G09620	AT5G09650	9	9
AT1G68110	AT1G68130	6	6
AT1G30300	AT1G30320	7	7
AT3G55530	AT3G55560	7	6
AT2G02790	AT2G02800	7	8
AT2G02950	AT2G02960	7	6
AT1G55360	AT1G55370	9	8
AT5G56030	AT5G56040	9	7
AT1G77760	AT1G77770	9	6
AT3G15090	AT3G15110	8	9
AT1G13780	AT1G13800	6	5
AT1G49470	AT1G49490	7	5
AT3G50370	AT3G50380	8	7
AT3G13130	AT3G13160	5	8
AT3G10380	AT3G10390	8	7
AT1G79940	AT1G79960	7	6
AT3G04520	AT3G04550	7	9
AT5G23250	AT5G23270	8	5
AT3G02350	AT3G02380	9	6
AT2G47000	AT2G47010	6	6
AT3G22990	AT3G23000	8	9
AT5G07810	AT5G07820	5	6
AT5G48230	AT5G48250	8	9
AT4G32400	AT4G32410	8	9
AT5G10010	AT5G10020	9	6
AT5G63940	AT5G63950	8	7
AT1G61140	AT1G61150	5	7
AT3G01670	AT3G01690	8	9
AT1G23090	AT1G23100	7	8
AT1G68050	AT1G68080	9	5
AT5G51410	AT5G51430	7	8
AT4G18040	AT4G18050	9	5
AT1G64690	AT1G64710	6	8
AT5G13740	AT5G13760	9	6
AT3G52880	AT3G52890	9	6
AT2G40000	AT2G40008	6	6
AT2G40000	AT2G40010	6	8
AT2G42247	AT2G42270	5	7
AT2G42250	AT2G42270	5	7
AT2G19540	AT2G19570	9	7
AT2G19540	AT2G19572	9	7
AT1G64170	AT1G64180	7	5
AT1G64050	AT1G64060	7	6
AT5G55480	AT5G55500	8	7
AT3G53130	AT3G53160	8	5
AT2G04620	AT2G04630	6	9
AT4G02940	AT4G02970	8	5
AT1G80290	AT1G80325	5	5
AT1G80290	AT1G80320	5	5
AT1G55250	AT1G55260	6	9
AT2G44750	AT2G44770	6	8
AT2G44760	AT2G44770	9	8
AT4G02100	AT4G02110	6	6
AT4G32160	AT4G32180	7	7
AT5G59690	AT5G59710	9	8
AT1G62590	AT1G62630	6	7
AT1G62600	AT1G62630	8	7
AT3G04810	AT3G04820	7	7
AT3G04810	AT3G04830	7	8
AT5G47490	AT5G47500	7	9
AT2G30490	AT2G30505	9	5
AT1G13790	AT1G13810	6	7
AT5G09420	AT5G09440	7	7
AT5G16300	AT5G16320	6	6
AT4G38900	AT4G38920	6	9
AT3G10670	AT3G10690	9	9
AT1G48390	AT1G48410	5	8
AT3G55950	AT3G55960	5	8
AT1G14910	AT1G14920	8	8
AT3G06380	AT3G06400	8	7
AT1G72540	AT1G72550	5	8
AT4G30790	AT4G30810	7	9
AT3G62600	AT3G62620	9	5
AT5G06710	AT5G06720	5	5
AT3G01300	AT3G01310	7	9
AT3G56130	AT3G56150	8	9
AT1G15780	AT1G15800	8	6
AT3G63200	AT3G63210	8	8
AT5G40250	AT5G40270	7	6
AT1G63250	AT1G63290	6	9
AT1G03960	AT1G03980	6	5
AT5G66730	AT5G66750	8	7
AT3G48440	AT3G48460	7	8
AT2G17520	AT2G17525	7	6
AT1G05460	AT1G05470	7	7
AT4G37150	AT4G37170	5	5
AT5G61030	AT5G61060	9	7
AT3G01460	AT3G01480	7	9
AT2G28800	AT2G28810	9	7
AT1G49490	AT1G49510	5	9
AT3G21700	AT3G21720	5	5
AT4G23920	AT4G23940	7	9
AT1G07080	AT1G07110	9	9
AT1G72170	AT1G72180	9	8
AT1G73480	AT1G73500	8	6
AT3G51290	AT3G51320	6	6
AT4G38200	AT4G38210	7	5
AT4G38200	AT4G38215	7	5
AT5G58520	AT5G58550	6	5
AT4G39180	AT4G39190	5	6
AT5G13520	AT5G13530	8	6
AT1G27880	AT1G27900	6	7
AT3G47890	AT3G47910	7	7
AT1G02020	AT1G02060	6	6
AT3G25970	AT3G26000	5	8
AT1G07910	AT1G07920	6	9
AT5G05760	AT5G05780	6	9
AT1G12810	AT1G12830	7	8
AT1G12810	AT1G12840	7	9
AT1G20350	AT1G20370	5	8
AT1G02080	AT1G02090	7	8
AT2G29200	AT2G29210	7	8
AT5G22780	AT5G22790	8	7
AT1G12710	AT1G12730	8	6
AT5G09330	AT5G09350	7	6
AT3G19820	AT3G19830	9	7
AT5G15300	AT5G15320	5	9
AT4G33220	AT4G33240	9	6
AT4G09150	AT4G09160	7	8
AT1G17255	AT1G17270	5	5
AT1G17260	AT1G17270	5	5
AT2G35760	AT2G35780	7	9
AT5G52520	AT5G52530	9	7
AT5G03940	AT5G03960	9	5
AT4G29040	AT4G29060	9	9
AT3G16850	AT3G16857	8	7
AT2G45140	AT2G45160	8	8
AT1G24440	AT1G24460	7	7
AT1G29320	AT1G29340	8	8
AT1G07920	AT1G07940	9	9
AT5G56890	AT5G56900	8	7
AT1G76400	AT1G76410	9	5
AT5G64660	AT5G64667	6	5
AT1G09290	AT1G09320	7	6
AT1G09300	AT1G09320	6	6
AT4G37430	AT4G37450	6	9
AT4G37432	AT4G37450	6	9
AT2G17900	AT2G17930	6	7
AT3G27220	AT3G27250	6	5
AT1G75400	AT1G75420	7	7
AT5G45260	AT5G45275	6	6
AT2G20240	AT2G20260	7	9
AT3G21220	AT3G21240	8	6
AT1G22920	AT1G22930	8	7
AT3G04790	AT3G04820	9	7
AT3G17210	AT3G17240	9	8
AT5G13770	AT5G13800	8	8
AT5G11690	AT5G11700	8	7
AT2G46510	AT2G46520	7	8
AT5G06720	AT5G06750	5	5
AT5G64120	AT5G64140	9	9
AT3G47700	AT3G47730	6	7
AT5G46250	AT5G46270	8	7
AT4G26600	AT4G26620	8	8
AT5G54080	AT5G54100	6	7
AT5G54090	AT5G54100	6	7
AT2G43330	AT2G43350	6	8
AT2G33170	AT2G33180	7	9
AT3G57765	AT3G57790	6	7
AT3G57770	AT3G57790	6	7
AT5G67520	AT5G67550	5	5
AT5G02870	AT5G02880	9	7
AT1G20050	AT1G20070	9	9
AT2G40770	AT2G40780	6	6
AT3G61480	AT3G61490	7	5
AT5G20590	AT5G20610	8	7
AT3G56020	AT3G56050	9	8
AT3G56030	AT3G56050	6	8
AT3G63170	AT3G63190	9	9
AT2G33810	AT2G33835	5	6
AT2G33815	AT2G33835	5	6
AT2G45030	AT2G45060	8	8
AT2G28110	AT2G28120	5	5
AT3G27670	AT3G27690	6	9
AT5G14260	AT5G14280	9	7
AT2G18915	AT2G18940	6	9
AT4G35470	AT4G35490	8	9
AT2G17840	AT2G17870	9	8
AT1G17070	AT1G17110	6	7
AT3G01410	AT3G01420	6	7
AT2G37690	AT2G37710	8	8
AT2G03380	AT2G03430	5	7
AT5G17640	AT5G17660	7	8
AT5G09770	AT5G09800	9	5
AT1G14070	AT1G14090	6	5
AT5G47750	AT5G47780	8	9
AT4G33030	AT4G33050	9	5
AT5G04885	AT5G04895	8	6
AT2G37560	AT2G37590	5	5
AT2G37570	AT2G37590	7	5
AT5G63570	AT5G63600	9	5
AT5G57150	AT5G57160	6	6
AT4G38120	AT4G38150	7	6
AT4G38120	AT4G38160	7	9
AT2G20230	AT2G20250	9	5
AT2G27450	AT2G27480	8	5
AT2G27450	AT2G27490	8	6
AT5G26910	AT5G26920	6	5
AT1G57870	AT1G57980	6	6
AT1G30570	AT1G30590	7	8
AT1G05910	AT1G05940	7	8
AT5G55560	AT5G55570	5	6
AT5G55560	AT5G55580	5	8
AT1G73710	AT1G73730	7	7
AT3G18480	AT3G18490	8	9
AT4G34280	AT4G34310	7	5
AT1G80260	AT1G80280	8	8
AT3G01370	AT3G01380	9	7
AT5G60710	AT5G60720	8	5
AT5G64410	AT5G64420	7	8
AT1G02970	AT1G02990	6	5
AT3G48050	AT3G48060	7	7
AT1G34160	AT1G34190	6	8
AT2G43330	AT2G43360	6	9
AT4G17070	AT4G17080	7	7
AT1G01580	AT1G01600	5	6
AT3G06050	AT3G06080	9	6
AT5G23720	AT5G23740	5	9
AT5G44780	AT5G44790	6	8
AT5G65450	AT5G65460	6	7
AT1G75040	AT1G75080	8	7
AT3G44330	AT3G44340	9	8
AT1G19640	AT1G19650	5	7
AT3G08550	AT3G08580	8	9
AT2G28315	AT2G28320	5	7
AT2G34730	AT2G34750	6	9
AT4G02080	AT4G02100	9	6
AT1G03440	AT1G03457	7	5
AT3G48280	AT3G48310	6	8
AT2G38080	AT2G38090	6	5
AT5G57460	AT5G57490	8	9
AT5G66620	AT5G66631	5	5
AT1G75500	AT1G75510	9	8
AT3G24535	AT3G24550	5	8
AT1G12860	AT1G12900	9	9
AT5G16570	AT5G16590	6	8
AT3G15930	AT3G15940	5	7
AT5G63760	AT5G63780	5	9
AT2G19670	AT2G19710	8	6
AT2G40320	AT2G40340	5	6
AT5G01620	AT5G01630	5	6
AT5G01620	AT5G01640	5	5
AT1G64530	AT1G64550	6	9
AT2G43790	AT2G43800	8	8
AT4G28180	AT4G28210	7	9
AT4G02010	AT4G02020	8	8
AT4G27260	AT4G27280	6	6
AT4G38230	AT4G38260	5	6
AT5G54830	AT5G54855	7	8
AT5G57190	AT5G57210	5	7
AT5G49980	AT5G50000	9	9
AT1G07070	AT1G07110	9	9
AT1G22040	AT1G22060	7	8
AT3G23400	AT3G23410	9	8
AT4G23440	AT4G23460	6	8
AT1G69260	AT1G69290	5	6
AT1G69270	AT1G69290	6	6
AT3G55410	AT3G55430	9	8
AT3G05600	AT3G05625	7	9
AT2G39980	AT2G39990	6	9
AT5G02470	AT5G02490	5	8
AT5G15790	AT5G15810	5	8
AT1G34190	AT1G34210	8	8
AT1G34190	AT1G34220	8	7
AT5G61800	AT5G61840	5	8
AT1G44800	AT1G44810	8	8
AT2G45910	AT2G45950	7	6
AT3G14430	AT3G14440	8	5
AT5G17230	AT5G17250	9	6
AT5G20590	AT5G20620	8	9
AT1G05410	AT1G05430	6	9
AT1G03220	AT1G03260	9	6
AT1G20910	AT1G20920	7	7
AT5G01920	AT5G01950	9	7
AT5G01930	AT5G01950	7	7
AT2G44065	AT2G44080	8	6
AT2G44065	AT2G44090	8	8
AT1G11260	AT1G11280	8	5
AT2G23760	AT2G23770	7	5
AT4G22710	AT4G22740	9	7
AT3G01180	AT3G01200	8	7
AT3G01180	AT3G01202	8	6
AT3G59940	AT3G59970	9	9
AT5G57350	AT5G57360	9	7
AT5G54380	AT5G54390	8	9
AT1G16800	AT1G16810	5	9
AT1G16800	AT1G16820	5	5
AT1G72175	AT1G72190	7	7
AT5G55910	AT5G55920	8	9
AT5G11580	AT5G11590	9	6
AT2G40900	AT2G40920	6	7
AT5G13390	AT5G13420	8	9
AT1G26940	AT1G26945	7	8
AT3G16180	AT3G16190	7	8
AT4G39390	AT4G39400	6	9
AT5G22930	AT5G22940	6	6
AT1G14560	AT1G14580	7	7
AT1G32190	AT1G32200	5	9
AT2G22690	AT2G22720	5	7
AT3G11910	AT3G11940	8	9
AT1G09590	AT1G09620	9	9
AT3G56870	AT3G56890	6	5
AT1G73720	AT1G73750	8	8
AT2G36420	AT2G36460	7	9
AT5G60600	AT5G60620	9	8
AT3G22072	AT3G22100	5	5
AT3G22070	AT3G22100	5	5
AT3G53960	AT3G53980	6	6
AT5G53150	AT5G53170	7	9
AT2G05755	AT2G05760	7	6
AT3G13980	AT3G13990	6	7
AT1G09570	AT1G09580	7	8
AT3G15090	AT3G15115	8	6
AT5G12860	AT5G12890	9	7
AT3G60820	AT3G60850	9	7
AT3G60830	AT3G60850	8	7
AT1G55120	AT1G55150	5	8
AT1G77460	AT1G77480	5	6
AT3G63370	AT3G63400	6	7
AT3G13060	AT3G13065	7	5
AT3G60350	AT3G60380	7	8
AT3G52870	AT3G52880	9	9
AT1G78995	AT1G79000	9	7
AT3G53830	AT3G53860	6	5
AT3G53830	AT3G53870	6	9
AT1G20630	AT1G20640	9	6
AT4G14455	AT4G14465	8	6
AT1G70100	AT1G70140	6	5
AT2G37480	AT2G37520	8	8
AT2G37478	AT2G37520	8	8
AT2G37500	AT2G37520	8	8
AT3G14660	AT3G14680	9	5
AT2G21060	AT2G21090	9	6
AT2G34710	AT2G34720	8	8
AT5G48530	AT5G48545	6	8
AT2G22670	AT2G22680	9	5
AT4G38980	AT4G39010	7	5
AT1G27590	AT1G27595	7	7
AT5G06130	AT5G06160	8	8
AT5G06140	AT5G06160	9	8
AT1G77380	AT1G77390	5	5
AT1G79990	AT1G80010	7	7
AT4G25980	AT4G26000	5	8
AT1G07910	AT1G07940	6	9
AT2G26740	AT2G26760	9	7
AT4G38225	AT4G38250	8	9
AT1G15290	AT1G15300	9	5
AT3G27390	AT3G27400	8	6
AT1G13280	AT1G13300	9	5
AT3G04130	AT3G04160	5	5
AT4G24290	AT4G24320	7	5
AT4G24290	AT4G24330	7	9
AT1G03370	AT1G03380	7	7
AT5G04720	AT5G04740	7	9
AT3G54560	AT3G54590	9	5
AT2G02070	AT2G02080	9	7
AT2G41250	AT2G41290	6	6
AT1G08510	AT1G08520	9	9
AT3G08760	AT3G08780	7	6
AT5G47720	AT5G47750	5	8
AT3G19290	AT3G19330	6	5
AT3G19300	AT3G19330	5	5
AT4G23740	AT4G23750	9	7
AT4G02730	AT4G02740	6	7
AT2G40520	AT2G40540	5	8
AT5G03110	AT5G03140	5	7
AT1G03910	AT1G03930	8	8
AT3G53130	AT3G53170	8	6
AT3G18090	AT3G18110	6	8
AT4G35470	AT4G35500	8	5
AT1G75295	AT1G75310	5	7
AT1G75300	AT1G75310	5	7
AT4G25810	AT4G25835	5	6
AT1G73950	AT1G73960	7	6
AT5G53890	AT5G53902	6	5
AT5G25100	AT5G25110	9	5
AT1G04310	AT1G04340	5	8
AT2G04850	AT2G04865	7	8
AT5G13590	AT5G13630	7	9
AT5G17020	AT5G17040	8	5
AT5G54430	AT5G54440	9	8
AT4G19160	AT4G19180	8	7
AT3G55110	AT3G55130	6	8
AT2G47230	AT2G47240	5	9
AT1G14320	AT1G14340	9	7
AT1G20300	AT1G20330	7	9
AT3G07290	AT3G07320	5	8
AT3G07960	AT3G07980	5	6
AT5G40480	AT5G40490	8	8
AT3G14350	AT3G14360	7	5
AT5G10750	AT5G10780	7	9
AT4G37130	AT4G37170	7	5
AT5G20480	AT5G20490	6	7
AT1G21810	AT1G21840	6	6
AT4G17670	AT4G17680	7	5
AT5G27000	AT5G27030	5	6
AT5G24470	AT5G24490	9	9
AT4G38225	AT4G38260	8	6
AT4G17810	AT4G17830	8	8
AT4G38460	AT4G38480	9	6
AT4G27100	AT4G27130	5	9
AT3G61200	AT3G61240	8	8
AT3G61210	AT3G61240	8	8
AT5G11490	AT5G11510	7	6
AT5G54520	AT5G54540	5	9
AT1G29550	AT1G29590	7	5
AT5G37020	AT5G37055	7	7
AT5G57330	AT5G57340	9	5
AT5G02160	AT5G02190	9	6
AT2G42270	AT2G42290	7	6
AT3G23530	AT3G23540	9	7
AT3G23530	AT3G23550	9	6
AT4G00590	AT4G00630	5	8
AT5G11650	AT5G11670	6	9
AT2G45070	AT2G45100	9	6
AT4G15545	AT4G15560	9	9
AT4G15550	AT4G15560	7	9
AT3G15890	AT3G15920	6	7
AT1G80020	AT1G80040	8	8
AT4G17060	AT4G17080	7	7
AT3G54820	AT3G54826	8	8
AT2G24270	AT2G24280	9	8
AT3G53410	AT3G53430	6	9
AT1G63080	AT1G63100	5	7
AT2G41560	AT2G41600	9	6
AT5G37720	AT5G37740	8	6
AT5G18630	AT5G18640	6	8
AT2G44150	AT2G44180	7	8
AT2G40950	AT2G40970	7	6
AT5G57700	AT5G57710	5	9
AT3G07260	AT3G07280	5	7
AT1G30290	AT1G30320	6	7
AT3G06433	AT3G06437	6	5
AT2G25220	AT2G25250	5	8
AT1G44110	AT1G44125	8	5
AT1G44110	AT1G44120	8	5
AT2G38960	AT2G38970	6	7
AT4G31080	AT4G31115	7	7
AT5G17910	AT5G17920	6	9
AT5G20830	AT5G20840	7	8
AT4G36910	AT4G36920	8	6
AT3G16320	AT3G16340	5	5
AT2G28910	AT2G28930	9	6
AT3G25545	AT3G25570	8	6
AT3G25545	AT3G25572	8	6
AT3G57030	AT3G57050	7	8
AT4G25610	AT4G25630	5	9
AT4G25610	AT4G25640	5	9
AT4G25620	AT4G25630	7	9
AT4G25620	AT4G25640	7	9
AT4G26060	AT4G26090	6	5
AT4G26060	AT4G26095	6	5
AT5G59570	AT5G59610	6	7
AT5G53800	AT5G53830	8	7
AT4G00231	AT4G00240	7	5
AT1G27910	AT1G27930	7	9
AT3G20810	AT3G20830	8	6
AT2G25650	AT2G25660	7	7
AT4G25680	AT4G25710	8	6
AT3G26730	AT3G26744	9	7
AT5G20230	AT5G20250	7	7
AT5G42080	AT5G42100	9	8
AT4G24630	AT4G24660	7	8
AT3G03440	AT3G03470	6	6
AT4G17060	AT4G17085	7	8
AT4G21300	AT4G21326	5	6
AT4G21310	AT4G21326	5	6
AT3G62330	AT3G62360	8	9
AT3G46200	AT3G46220	7	6
AT1G14020	AT1G14040	7	6
AT1G48830	AT1G48860	9	8
AT5G19120	AT5G19140	7	9
AT5G16730	AT5G16750	8	8
AT5G16730	AT5G16760	8	9
AT4G10100	AT4G10120	7	8
AT4G10110	AT4G10120	8	8
AT5G41110	AT5G41130	6	5
AT3G07510	AT3G07530	6	5
AT3G52860	AT3G52880	7	9
AT1G76150	AT1G76170	8	6
AT2G35330	AT2G35350	7	6
AT2G35340	AT2G35350	6	6
AT1G73602	AT1G73620	9	8
AT1G73600	AT1G73620	9	8
AT3G55290	AT3G55320	5	7
AT2G21140	AT2G21160	9	9
AT2G21140	AT2G21170	9	9
AT1G44890	AT1G44900	6	7
AT4G14465	AT4G14480	6	6
AT5G17630	AT5G17660	9	8
AT3G59670	AT3G59690	8	5
AT3G59670	AT3G59695	8	5
AT3G27250	AT3G27260	5	7
AT3G15200	AT3G15220	5	7
AT1G69350	AT1G69370	5	7
AT3G06520	AT3G06530	5	7
AT2G46520	AT2G46530	8	5
AT4G13505	AT4G13530	8	8
AT4G13510	AT4G13530	9	8
AT4G28950	AT4G28980	6	7
AT5G52030	AT5G52050	6	5
AT5G52040	AT5G52050	8	5
AT1G48090	AT1G48100	7	6
AT5G57940	AT5G57970	6	5
AT1G28010	AT1G28050	5	8
AT1G64600	AT1G64620	7	5
AT1G64610	AT1G64620	5	5
AT4G39070	AT4G39080	5	9
AT1G29350	AT1G29370	9	9
AT2G40030	AT2G40060	6	9
AT4G22560	AT4G22580	6	7
AT2G17210	AT2G17230	5	8
AT5G39530	AT5G39550	9	7
AT1G70950	AT1G70980	5	7
AT3G01340	AT3G01360	8	6
AT3G01340	AT3G01370	8	9
AT1G06230	AT1G06270	7	6
AT2G31150	AT2G31170	7	8
AT2G06025	AT2G06050	8	7
AT4G12800	AT4G12830	9	9
AT5G11310	AT5G11330	5	9
AT4G27852	AT4G27870	5	9
AT5G21010	AT5G21040	7	7
AT5G64420	AT5G64440	8	8
AT4G30700	AT4G30720	6	9
AT1G69870	AT1G69900	9	6
AT5G40770	AT5G40780	9	6
AT2G39990	AT2G40008	9	6
AT2G39990	AT2G40010	9	8
AT5G27460	AT5G27490	6	7
AT2G30020	AT2G30050	7	8
AT4G12750	AT4G12770	7	7
AT1G53210	AT1G53240	9	9
AT2G31350	AT2G31370	6	6
AT1G72340	AT1G72390	8	7
AT2G48110	AT2G48140	7	5
AT5G42740	AT5G42760	9	6
AT5G56240	AT5G56250	7	6
AT3G49660	AT3G49680	7	9
AT3G46960	AT3G46970	7	9
AT2G26250	AT2G26260	9	6
AT2G24830	AT2G24860	7	8
AT2G15880	AT2G15900	6	7
AT4G11660	AT4G11680	6	7
AT4G11670	AT4G11680	6	7
AT1G72300	AT1G72320	6	6
AT5G13930	AT5G13950	9	7
AT5G35735	AT5G35740	9	8
AT1G17350	AT1G17370	6	8
AT1G21710	AT1G21730	7	7
AT2G16440	AT2G16485	8	8
AT1G16220	AT1G16260	6	5
AT4G30950	AT4G30960	9	9
AT5G08600	AT5G08630	5	7
AT5G08610	AT5G08630	9	7
AT2G26060	AT2G26080	7	9
AT1G16830	AT1G16870	5	8
AT4G30780	AT4G30800	7	8
AT1G54040	AT1G54060	7	8
AT4G13918	AT4G13940	5	9
AT4G13920	AT4G13940	5	9
AT1G70330	AT1G70370	8	9
AT1G70340	AT1G70370	6	9
AT5G24030	AT5G24060	7	8
AT3G11460	AT3G11490	5	7
AT4G38520	AT4G38552	8	7
AT4G38520	AT4G38550	8	8
AT2G47160	AT2G47170	6	9
AT5G63800	AT5G63830	9	6
AT4G33580	AT4G33620	9	6
AT5G52820	AT5G52830	8	6
AT2G33290	AT2G33320	6	6
AT1G16590	AT1G16630	6	6
AT1G31350	AT1G31360	5	6
AT3G17611	AT3G17650	5	8
AT3G19150	AT3G19170	6	9
AT2G35650	AT2G35680	7	9
AT3G45980	AT3G46000	9	9
AT4G12710	AT4G12740	6	5
AT5G09760	AT5G09800	7	5
AT4G36050	AT4G36080	5	5
AT5G09870	AT5G09880	9	9
AT1G22860	AT1G22870	6	6
AT1G61240	AT1G61260	5	6
AT2G22470	AT2G22480	6	8
AT4G39955	AT4G39980	6	9
AT1G14340	AT1G14350	7	6
AT1G14345	AT1G14350	9	6
AT3G27570	AT3G27610	9	6
AT1G51110	AT1G51140	9	8
AT4G17810	AT4G17840	8	9
AT5G60390	AT5G60410	9	7
AT4G18010	AT4G18020	7	6
AT5G64400	AT5G64420	9	8
AT3G60600	AT3G60630	8	8
AT1G28260	AT1G28280	5	8
AT1G67180	AT1G67210	6	5
AT3G11580	AT3G11590	5	8
AT4G03080	AT4G03100	8	8
AT2G28440	AT2G28470	5	8
AT2G17450	AT2G17470	8	5
AT1G59820	AT1G59830	7	8
AT5G60840	AT5G60860	8	7
AT4G30340	AT4G30350	7	7
AT1G07920	AT1G07950	9	8
AT1G07920	AT1G07960	9	6
AT3G13782	AT3G13800	5	7
AT3G18215	AT3G18230	8	7
AT5G14800	AT5G14840	9	7
AT1G31730	AT1G31760	9	7
AT5G02460	AT5G02490	5	8
AT1G53670	AT1G53700	9	5
AT1G53680	AT1G53700	5	5
AT2G27930	AT2G27950	5	8
AT1G53430	AT1G53440	7	8
AT4G17330	AT4G17340	9	9
AT5G55900	AT5G55920	5	9
AT3G19700	AT3G19720	5	8
AT3G19700	AT3G19740	5	8
AT1G52430	AT1G52450	5	5
AT1G11680	AT1G11710	9	5
AT1G22860	AT1G22880	6	5
AT1G47270	AT1G47290	6	6
AT4G28706	AT4G28710	7	7
AT5G21280	AT5G21990	5	8
AT5G43310	AT5G43330	6	8
AT3G04770	AT3G04810	6	7
AT1G17440	AT1G17450	7	5
AT2G18245	AT2G18280	8	8
AT2G18245	AT2G18290	8	8
AT5G20960	AT5G20990	6	9
AT1G70210	AT1G70230	8	7
AT5G55970	AT5G56000	5	9
AT3G48350	AT3G48380	8	6
AT1G34270	AT1G34300	6	6
AT2G46520	AT2G46535	8	7
AT5G57360	AT5G57390	7	5
AT2G35760	AT2G35795	7	8
AT1G18700	AT1G18710	6	5
AT1G69680	AT1G69690	7	8
AT1G07705	AT1G07720	7	8
AT5G12260	AT5G12290	6	7
AT1G26760	AT1G26770	5	9
AT1G61380	AT1G61400	7	5
AT1G05560	AT1G05570	9	6
AT1G05562	AT1G05570	8	6
AT1G05030	AT1G05055	8	7
AT5G01180	AT5G01190	5	5
AT3G24870	AT3G24880	6	6
AT5G24460	AT5G24490	9	9
AT1G80070	AT1G80080	9	8
AT5G15390	AT5G15410	8	8
AT5G19120	AT5G19150	7	6
AT5G19130	AT5G19150	6	6
AT2G45660	AT2G45670	8	8
AT1G23090	AT1G23110	7	5
AT3G07860	AT3G07890	8	7
AT4G19520	AT4G19530	7	9
AT5G47810	AT5G47820	6	7
AT4G35940	AT4G35985	6	5
AT4G32295	AT4G32320	5	9
AT2G01110	AT2G01130	9	7
AT2G01110	AT2G01140	9	9
AT4G36580	AT4G36620	6	5
AT3G16850	AT3G16860	8	5
AT1G54360	AT1G54385	6	6
AT1G23860	AT1G23890	6	5
AT4G21620	AT4G21650	9	7
AT4G27880	AT4G27910	7	6
AT5G63570	AT5G63610	9	7
AT5G05690	AT5G05700	8	7
AT3G47610	AT3G47620	7	8
AT5G51400	AT5G51430	9	8
AT5G47040	AT5G47050	9	6
AT5G01810	AT5G01830	6	6
AT1G31360	AT1G31410	6	8
AT3G13682	AT3G13710	5	5
AT3G13682	AT3G13700	5	5
AT5G64240	AT5G64270	7	9
AT5G64250	AT5G64270	7	9
AT5G17220	AT5G17250	9	6
AT1G53490	AT1G53520	6	9
AT1G53500	AT1G53520	9	9
AT1G21610	AT1G21630	6	7
AT1G11390	AT1G11420	7	5
AT1G11390	AT1G11430	7	9
AT4G25940	AT4G25960	7	8
AT1G60900	AT1G60930	9	5
AT4G39090	AT4G39120	9	8
AT1G62050	AT1G62085	7	6
AT2G26430	AT2G26460	6	7
AT3G18830	AT3G18850	8	5
AT1G71710	AT1G71730	7	9
AT3G63000	AT3G63030	8	7
AT4G28680	AT4G28706	5	7
AT2G01280	AT2G01330	6	5
AT2G01290	AT2G01330	9	5
AT5G18670	AT5G18700	6	8
AT1G61340	AT1G61360	5	5
AT2G17670	AT2G17700	6	8
AT1G62860	AT1G62870	5	5
AT1G54780	AT1G54830	9	7
AT1G26550	AT1G26570	9	7
AT2G47490	AT2G47510	7	9
AT4G08180	AT4G08210	6	5
AT5G52882	AT5G52890	8	5
AT4G31540	AT4G31560	7	9
AT3G03770	AT3G03780	8	9
AT2G23310	AT2G23330	8	5
AT1G14900	AT1G14920	8	8
AT2G40520	AT2G40550	5	8
AT2G28350	AT2G28360	7	7
AT1G76060	AT1G76100	7	9
AT3G51740	AT3G51770	8	6
AT1G20960	AT1G20970	8	8
AT1G21730	AT1G21740	7	6
AT1G64370	AT1G64385	9	8
AT2G28310	AT2G28320	7	7
AT1G58520	AT1G58602	6	8
AT1G58520	AT1G58561	6	5
AT5G58120	AT5G58140	5	8
AT5G58120	AT5G58150	5	5
AT5G58130	AT5G58140	8	8
AT5G58130	AT5G58150	8	5
AT5G64430	AT5G64460	7	6
AT3G60380	AT3G60400	8	6
AT3G58610	AT3G58630	9	6
AT2G35430	AT2G35490	6	9
AT2G38820	AT2G38860	5	7
AT3G59980	AT3G60030	9	8
AT3G18480	AT3G18500	8	7
AT4G14050	AT4G14070	6	9
AT1G17110	AT1G17140	7	8
AT3G61990	AT3G62010	7	7
AT4G26640	AT4G26660	7	7
AT5G01830	AT5G01850	6	6
AT1G07320	AT1G07360	9	9
AT1G49710	AT1G49730	7	6
AT1G33330	AT1G33360	8	7
AT4G20880	AT4G20910	7	6
AT5G16320	AT5G16370	6	7
AT1G47840	AT1G47860	5	5
AT1G20390	AT1G20410	6	7
AT1G09500	AT1G09530	5	6
AT2G40030	AT2G40070	6	7
AT5G08470	AT5G08490	7	5
AT5G24320	AT5G24330	6	5
AT5G24320	AT5G24340	6	7
AT1G14345	AT1G14360	9	8
AT5G49360	AT5G49370	7	5
AT5G58620	AT5G58670	6	6
AT3G60030	AT3G60040	8	5
AT5G51560	AT5G51590	8	6
AT2G30060	AT2G30080	9	6
AT4G15093	AT4G15110	6	9
AT2G32440	AT2G32470	7	6
AT5G24470	AT5G24500	9	8
AT2G18690	AT2G18700	5	6
AT5G45650	AT5G45660	8	6
AT5G64730	AT5G64740	7	9
AT5G05680	AT5G05700	6	7
AT1G63690	AT1G63710	8	5
AT3G63190	AT3G63210	9	8
AT1G11680	AT1G11720	9	8
AT3G14750	AT3G14790	6	8
AT5G62810	AT5G62865	9	5
AT1G51405	AT1G51440	6	5
AT2G32910	AT2G32940	8	5
AT2G40600	AT2G40630	9	7
AT2G40610	AT2G40630	9	7
AT4G12290	AT4G12330	9	5
AT4G15440	AT4G15475	6	7
AT5G07800	AT5G07820	6	6
AT4G11130	AT4G11140	5	6
AT4G38600	AT4G38630	8	9
AT3G49560	AT3G49600	9	7
AT4G39850	AT4G39860	7	7
AT4G38680	AT4G38740	9	9
AT1G13860	AT1G13900	5	7
AT1G14710	AT1G14740	8	8
AT3G27320	AT3G27325	6	6
AT5G62990	AT5G63040	7	7
AT4G36860	AT4G36870	7	7
AT1G10450	AT1G10470	7	9
AT5G63910	AT5G63930	8	6
AT5G63920	AT5G63930	6	6
AT4G14465	AT4G14490	6	5
AT1G14610	AT1G14640	9	5
AT5G01400	AT5G01420	7	5
AT4G15975	AT4G16000	5	5
AT2G37630	AT2G37650	9	5
AT5G16560	AT5G16570	7	6
AT5G50930	AT5G50960	5	9
AT2G39980	AT2G40000	6	6
AT1G29300	AT1G29330	5	6
AT3G07670	AT3G07720	9	8
AT2G37040	AT2G37050	9	6
AT1G19310	AT1G19350	8	8
AT2G47960	AT2G47990	8	8
AT3G62000	AT3G62010	7	7
AT3G62000	AT3G62020	7	6
AT2G28800	AT2G28830	9	5
AT4G34200	AT4G34230	9	7
AT5G67320	AT5G67350	8	7
AT1G23450	AT1G23490	5	9
AT4G03520	AT4G03550	9	8
AT2G32235	AT2G32250	7	5
AT5G47220	AT5G47240	7	9
AT5G27270	AT5G27290	8	8
AT3G17800	AT3G17830	8	7
AT1G67480	AT1G67500	8	5
AT2G18193	AT2G18220	6	8
AT5G11090	AT5G11110	8	5
AT1G29410	AT1G29470	5	9
AT3G13970	AT3G13990	6	7
AT3G14690	AT3G14730	9	5
AT4G38500	AT4G38530	8	5
AT4G38500	AT4G38545	8	5
AT4G38500	AT4G38540	8	6
AT4G38510	AT4G38530	8	5
AT4G38510	AT4G38545	8	5
AT4G38510	AT4G38540	8	6
AT3G48540	AT3G48560	6	9
AT1G50500	AT1G50570	7	7
AT3G06433	AT3G06440	6	6
AT4G30780	AT4G30810	7	9
AT5G62770	AT5G62810	5	9
AT2G02100	AT2G02130	9	9
AT3G05680	AT3G05685	6	5
AT2G27480	AT2G27510	5	9
AT4G01440	AT4G01450	5	5
AT3G01330	AT3G01350	6	5
AT3G01330	AT3G01360	6	6
AT5G66760	AT5G66790	9	5
AT5G24460	AT5G24500	9	8
AT1G17480	AT1G17500	6	7
AT4G03260	AT4G03280	9	9
AT4G10100	AT4G10130	7	6
AT4G10110	AT4G10130	8	6
AT1G20900	AT1G20920	5	7
AT2G20590	AT2G20610	6	9
AT5G59720	AT5G59750	6	7
AT1G60140	AT1G60160	6	8
AT5G67280	AT5G67300	8	8
AT1G72750	AT1G72790	9	6
AT4G03415	AT4G03430	7	8
AT5G60840	AT5G60870	8	5
AT4G02680	AT4G02710	8	7
AT4G29840	AT4G29900	9	8
AT2G19950	AT2G19990	7	5
AT4G27650	AT4G27660	8	5
AT3G28160	AT3G28180	7	9
AT2G33450	AT2G33490	9	7
AT1G66345	AT1G66350	5	6
AT2G25690	AT2G25710	5	7
AT5G67450	AT5G67480	5	9
AT4G29950	AT4G30000	6	5
AT5G62865	AT5G62890	5	8
AT1G29730	AT1G29750	5	6
AT3G12970	AT3G12980	5	7
AT5G64660	AT5G64680	6	6
AT1G22920	AT1G22940	8	8
AT1G76320	AT1G76360	6	7
AT1G80510	AT1G80550	7	6
AT5G48160	AT5G48180	8	9
AT4G18020	AT4G18040	6	9
AT1G30570	AT1G30600	7	7
AT1G20980	AT1G21000	8	6
AT5G65630	AT5G65650	9	8
AT3G27180	AT3G27190	9	7
AT1G18090	AT1G18140	6	5
AT1G18100	AT1G18140	5	5
AT4G37530	AT4G37553	5	5
AT4G37530	AT4G37560	5	6
AT1G69750	AT1G69770	7	8
AT1G62370	AT1G62390	5	9
AT5G09250	AT5G09310	7	8
AT5G09250	AT5G09320	7	5
AT5G09260	AT5G09310	7	8
AT5G09260	AT5G09320	7	5
AT5G04940	AT5G04980	6	5
AT2G44060	AT2G44090	9	8
AT5G44180	AT5G44200	7	7
AT4G00230	AT4G00240	7	5
AT1G26540	AT1G26570	5	7
AT4G14970	AT4G15010	5	6
AT2G17820	AT2G17840	7	9
AT2G44930	AT2G44950	5	7
AT5G20170	AT5G20200	7	8
AT5G47800	AT5G47820	6	7
AT4G17440	AT4G17460	5	7
AT5G60870	AT5G60900	5	5
AT1G06960	AT1G07000	6	6
AT2G34650	AT2G34660	6	7
AT3G53540	AT3G53560	7	9
AT3G53540	AT3G53570	7	6
AT4G30130	AT4G30150	5	7
AT2G43970	AT2G44020	9	6
AT3G15010	AT3G15040	8	7
AT1G74800	AT1G74840	7	8
AT4G31540	AT4G31570	7	7
AT3G05210	AT3G05240	7	5
AT3G45830	AT3G45850	7	7
AT4G36250	AT4G36270	9	5
AT3G19190	AT3G19210	6	5
AT3G58110	AT3G58130	7	5
AT3G58110	AT3G58140	7	9
AT3G60130	AT3G60160	6	5
AT5G03260	AT5G03280	6	8
AT5G06530	AT5G06560	5	7
AT5G63200	AT5G63260	7	6
AT5G44130	AT5G44160	9	5
AT3G04500	AT3G04550	8	9
AT1G32530	AT1G32550	7	9
AT5G11480	AT5G11510	9	6
AT1G07480	AT1G07520	7	5
AT2G44910	AT2G44930	5	5
AT1G09960	AT1G09980	6	7
AT2G16380	AT2G16390	7	6
AT5G52470	AT5G52510	9	7
AT1G06710	AT1G06730	6	7
AT1G52160	AT1G52190	7	8
AT2G20560	AT2G20580	5	9
AT3G59400	AT3G59420	9	6
AT3G46740	AT3G46780	9	9
AT1G72140	AT1G72160	5	9
AT5G53400	AT5G53420	8	8
AT1G08090	AT1G08110	5	8
AT4G32360	AT4G32390	7	9
AT4G30940	AT4G30960	5	9
AT3G08530	AT3G08570	9	5
AT5G16590	AT5G16610	8	6
AT1G66340	AT1G66350	7	6
AT1G54410	AT1G54440	9	7
AT4G03390	AT4G03415	8	7
AT5G24020	AT5G24060	9	8
AT1G30440	AT1G30460	9	7
AT1G44350	AT1G44446	5	8
AT1G51130	AT1G51170	6	7
AT5G48300	AT5G48320	9	5
AT3G27530	AT3G27560	8	7
AT2G36900	AT2G36910	6	9
AT2G37620	AT2G37650	7	5
AT4G30190	AT4G30200	9	7
AT1G25560	AT1G25570	8	8
AT5G47490	AT5G47520	7	7
AT4G15180	AT4G15210	7	6
AT4G29350	AT4G29380	9	7
AT4G29350	AT4G29390	9	9
AT4G29360	AT4G29380	6	7
AT4G29360	AT4G29390	6	9
AT1G20840	AT1G20870	8	6
AT1G08310	AT1G08350	5	5
AT1G08315	AT1G08350	6	5
AT3G12915	AT3G12930	6	9
AT3G22990	AT3G23020	8	6
AT3G60380	AT3G60410	8	6
AT1G75440	AT1G75460	7	9
AT5G19620	AT5G19650	8	5
AT3G01400	AT3G01430	6	5
AT4G35470	AT4G35510	8	7
AT5G64100	AT5G64130	6	9
AT5G53120	AT5G53140	5	9
AT5G53130	AT5G53140	8	9
AT5G25080	AT5G25110	8	5
AT1G05300	AT1G05340	6	5
AT3G44820	AT3G44850	6	7
AT1G31710	AT1G31730	7	9
AT5G27920	AT5G27930	5	7
AT5G24280	AT5G24290	5	5
AT1G58210	AT1G58230	5	7
AT1G48790	AT1G48830	8	9
AT4G40050	AT4G40065	8	7
AT5G22760	AT5G22770	7	7
AT1G09240	AT1G09280	6	7
AT1G17430	AT1G17450	6	5
AT5G07630	AT5G07660	7	5
AT1G02000	AT1G02050	6	6
AT3G03470	AT3G03520	6	6
AT5G49650	AT5G49665	8	6
AT1G04230	AT1G04260	7	7
AT5G66750	AT5G66790	7	5
AT2G22420	AT2G22430	6	9
AT1G53490	AT1G53530	6	6
AT1G53500	AT1G53530	9	6
AT3G11570	AT3G11590	5	8
AT3G26850	AT3G26890	6	6
AT3G18940	AT3G18960	8	7
AT2G29660	AT2G29690	6	8
AT3G15590	AT3G15610	8	8
AT2G46650	AT2G46680	9	6
AT2G05590	AT2G05630	6	8
AT5G23860	AT5G23880	8	8
AT4G37250	AT4G37260	6	7
AT4G37250	AT4G37270	6	9
AT5G45260	AT5G45276	6	5
AT3G01320	AT3G01330	6	6
AT3G19910	AT3G19950	8	8
AT5G57035	AT5G57070	7	6
AT3G17205	AT3G17240	6	8
AT3G26480	AT3G26490	5	6
AT4G00380	AT4G00420	6	6
AT2G15880	AT2G15910	6	6
AT5G22090	AT5G22100	9	8
AT4G32270	AT4G32290	7	7
AT4G16970	AT4G17000	6	6
AT3G27230	AT3G27260	9	7
AT1G25682	AT1G25988	8	5
AT1G14890	AT1G14920	7	8
AT5G57040	AT5G57070	9	6
AT1G52750	AT1G52780	5	7
AT3G51050	AT3G51075	8	5
AT3G51050	AT3G51070	8	5
AT2G47230	AT2G47250	5	9
AT2G15310	AT2G15320	5	7
AT3G15180	AT3G15220	7	7
AT1G13250	AT1G13260	8	7
AT2G35740	AT2G35780	5	9
AT2G37630	AT2G37660	9	9
AT5G15970	AT5G16000	9	8
AT1G26910	AT1G26930	8	5
AT4G02730	AT4G02750	6	6
AT5G47220	AT5G47250	7	5
AT1G62790	AT1G62830	8	7
AT5G18930	AT5G18940	5	8
AT3G25250	AT3G25290	5	5
AT2G23330	AT2G23350	5	9
AT1G74240	AT1G74290	6	5
AT1G08050	AT1G08070	5	5
AT2G30050	AT2G30080	8	6
AT4G23740	AT4G23760	9	8
AT3G47610	AT3G47630	7	5
AT1G14340	AT1G14360	7	8
AT4G02930	AT4G02940	9	8
AT5G19120	AT5G19151	7	6
AT1G64620	AT1G64630	5	6
AT1G64620	AT1G64628	5	6
AT2G46420	AT2G46450	7	6
AT2G17540	AT2G17570	6	6
AT2G18560	AT2G18600	6	5
AT3G52850	AT3G52880	9	9
AT2G05590	AT2G05620	6	9
AT2G41890	AT2G41900	7	9
AT1G70000	AT1G70020	5	5
AT5G47660	AT5G47700	7	9
AT2G20550	AT2G20580	5	9
AT3G56020	AT3G56060	9	7
AT3G56030	AT3G56060	6	7
AT2G31270	AT2G31290	7	5
AT5G20740	AT5G20790	8	8
AT3G09160	AT3G09180	6	8
AT5G28530	AT5G28540	6	9
AT5G22400	AT5G22450	6	8
AT4G18130	AT4G18160	8	6
AT3G46180	AT3G46200	7	7
AT1G15180	AT1G15215	8	5
AT2G25180	AT2G25210	8	9
AT3G06433	AT3G06450	6	7
AT3G09162	AT3G09190	7	6
AT5G44050	AT5G44070	6	9
AT5G64640	AT5G64670	7	9
AT1G64355	AT1G64385	9	8
AT5G01180	AT5G01200	5	5
AT4G26520	AT4G26550	9	7
AT5G52860	AT5G52882	6	8
AT3G23810	AT3G23820	9	9
AT3G27325	AT3G27330	6	5
AT5G58040	AT5G58090	8	8
AT3G07370	AT3G07410	7	8
AT3G07370	AT3G07420	7	6
AT1G07260	AT1G07290	5	5
AT3G49290	AT3G49320	7	7
AT2G39340	AT2G39360	8	7
AT4G17490	AT4G17510	5	8
AT5G60860	AT5G60900	7	5
AT3G62470	AT3G62500	6	5
AT3G22880	AT3G22890	7	9
AT3G22880	AT3G22900	7	6
AT4G17440	AT4G17470	5	6
AT4G21620	AT4G21660	9	8
AT1G22710	AT1G22730	9	8
AT4G27640	AT4G27660	8	5
AT2G15300	AT2G15320	5	7
AT5G64816	AT5G64860	8	9
AT4G27910	AT4G27950	6	6
AT5G22090	AT5G22110	9	6
AT5G53450	AT5G53460	9	8
AT2G16405	AT2G16430	7	8
AT1G79090	AT1G79120	8	5
AT2G19830	AT2G19860	9	8
AT2G22120	AT2G22125	6	8
AT1G15750	AT1G15780	7	8
AT4G11120	AT4G11140	8	6
AT5G45500	AT5G45510	7	8
AT2G19490	AT2G19520	7	9
AT2G29650	AT2G29680	9	5
AT5G20170	AT5G20220	7	6
AT4G36150	AT4G36180	5	8
AT4G11300	AT4G11320	5	9
AT5G19120	AT5G19160	7	5
AT2G30210	AT2G30250	6	6
AT1G68110	AT1G68140	6	6
AT1G79970	AT1G80010	8	7
AT3G12915	AT3G12940	6	6
AT3G18820	AT3G18850	9	5
AT3G09160	AT3G09190	6	6
AT1G18620	AT1G18670	7	7
AT1G27900	AT1G27930	7	9
AT3G24020	AT3G24070	5	7
AT2G18120	AT2G18150	5	7
AT1G06950	AT1G07000	9	6
AT3G63180	AT3G63210	6	8
AT5G03680	AT5G03720	5	6
AT1G71697	AT1G71730	6	9
AT2G41700	AT2G41710	6	6
AT5G04460	AT5G04480	5	6
AT2G28290	AT2G28310	6	7
AT5G40890	AT5G40910	8	8
AT3G24530	AT3G24550	7	8
AT2G34710	AT2G34730	8	6
AT5G18590	AT5G18610	7	6
AT3G49645	AT3G49670	7	9
AT3G60510	AT3G60540	5	5
AT4G30160	AT4G30190	8	9
AT3G15000	AT3G15040	9	7
AT4G16770	AT4G16790	7	6
AT5G47810	AT5G47830	6	6
AT4G35940	AT4G36000	6	5
AT4G30340	AT4G30360	7	7
AT1G13250	AT1G13270	8	9
AT3G59640	AT3G59680	6	5
AT3G12290	AT3G12360	9	8
AT4G22540	AT4G22550	7	7
AT4G34110	AT4G34140	9	6
AT1G69526	AT1G69550	5	7
AT1G13960	AT1G13980	6	6
AT2G23520	AT2G23560	7	5
AT5G47540	AT5G47590	8	5
AT5G05410	AT5G05460	5	5
AT1G07250	AT1G07290	8	5
AT5G11510	AT5G11530	6	7
AT4G24100	AT4G24140	6	5
AT1G68100	AT1G68140	8	6
AT2G37035	AT2G37050	7	6
AT4G23740	AT4G23770	9	6
AT3G19050	AT3G19080	6	6
AT5G01830	AT5G01870	6	7
AT1G30420	AT1G30450	5	6
AT4G15420	AT4G15450	7	7
AT3G16410	AT3G16450	7	7
AT2G24120	AT2G24150	8	9
AT1G30200	AT1G30240	7	6
AT5G54510	AT5G54520	7	5
AT3G13300	AT3G13330	8	8
AT2G35800	AT2G35880	8	8
AT4G25450	AT4G25500	7	7
AT3G16170	AT3G16200	7	7
AT3G25585	AT3G25610	6	6
AT1G69526	AT1G69543	5	5
AT4G16143	AT4G16150	8	8
AT1G56120	AT1G56140	5	7
AT1G26900	AT1G26930	6	5
AT1G28060	AT1G28090	8	6
AT1G22710	AT1G22740	9	7
AT2G21340	AT2G21380	8	9
AT4G36090	AT4G36120	5	5
AT2G17110	AT2G17130	6	7
AT3G05210	AT3G05250	7	6
AT1G32080	AT1G32120	9	6
AT3G11570	AT3G11591	5	5
AT5G16550	AT5G16570	8	6
AT1G63440	AT1G63490	5	7
AT2G05920	AT2G05940	9	8
AT4G16340	AT4G16360	8	7
AT5G26850	AT5G26910	6	6
AT5G05810	AT5G05850	5	6
AT1G28420	AT1G28440	8	8
AT2G18950	AT2G18960	9	9
AT3G53030	AT3G53090	7	5
AT1G44750	AT1G44780	6	6
AT2G36620	AT2G36670	9	5
AT2G44065	AT2G44100	8	8
AT5G44180	AT5G44190	7	9
AT3G05200	AT3G05240	6	5
AT5G60820	AT5G60870	6	5
AT4G32770	AT4G32800	8	6
AT3G18270	AT3G18290	8	9
AT5G48580	AT5G48610	9	6
AT5G48590	AT5G48610	9	6
AT1G75710	AT1G75760	8	7
AT5G42820	AT5G42870	9	7
AT5G05010	AT5G05060	9	9
AT5G53400	AT5G53430	8	6
AT2G36930	AT2G36960	9	5
AT2G26100	AT2G26140	8	9
AT3G47400	AT3G47450	5	8
AT5G42480	AT5G42520	9	7
AT4G25450	AT4G25515	7	6
AT5G49360	AT5G49390	7	5
AT2G41880	AT2G41900	7	9
AT1G15740	AT1G15780	8	8
AT5G47130	AT5G47160	5	5
AT5G08450	AT5G08500	7	8
AT1G54000	AT1G54040	6	7
AT5G23250	AT5G23300	8	8
AT5G52810	AT5G52850	8	6
AT2G30500	AT2G30550	7	5
AT2G29410	AT2G29500	5	7
AT3G60380	AT3G60420	8	5
AT5G60950	AT5G60980	5	8
AT2G30750	AT2G30780	5	7
AT2G40730	AT2G40760	8	8
AT2G40730	AT2G40765	8	9
AT3G27170	AT3G27190	5	7
AT5G62670	AT5G62690	8	9
AT1G01030	AT1G01040	5	6
AT3G26782	AT3G26810	6	8
AT2G39280	AT2G39330	7	5
AT3G11560	AT3G11590	8	8
AT1G80400	AT1G80440	7	7
AT3G55730	AT3G55760	6	8
AT5G63940	AT5G63970	8	5
AT5G65380	AT5G65420	8	5
AT2G33170	AT2G33205	7	5
AT3G24300	AT3G24320	5	6
AT4G32980	AT4G33030	9	9
AT2G17450	AT2G17480	8	7
AT2G36026	AT2G36060	6	8
AT1G14700	AT1G14740	7	8
AT5G52890	AT5G52910	5	6
AT4G38650	AT4G38730	5	6
AT2G27760	AT2G27775	6	8
AT1G43850	AT1G43886	7	5
AT1G43860	AT1G43886	8	5
AT2G03240	AT2G03270	7	6
AT4G29170	AT4G29210	6	7
AT1G67120	AT1G67140	6	6
AT1G51670	AT1G51700	5	8
AT2G01180	AT2G01220	6	8
AT5G53130	AT5G53150	8	7
AT2G38940	AT2G38970	8	7
AT4G25440	AT4G25500	7	7
AT2G28320	AT2G28350	7	7
AT1G08250	AT1G08260	7	7
AT1G54520	AT1G54570	9	8
AT3G27870	AT3G27890	6	9
AT5G63940	AT5G63960	8	6
AT3G12965	AT3G12980	9	7
AT2G41220	AT2G41240	8	9
AT1G61870	AT1G61900	9	6
AT4G35230	AT4G35250	9	9
AT3G51895	AT3G51930	6	6
AT1G34245	AT1G34260	7	7
AT5G47520	AT5G47580	7	6
AT2G15630	AT2G15690	5	8
AT5G47800	AT5G47830	6	6
AT3G26470	AT3G26490	5	6
AT4G37730	AT4G37750	5	8
AT3G07960	AT3G07990	5	7
AT5G45330	AT5G45350	6	9
AT2G25730	AT2G25737	7	6
AT3G26480	AT3G26500	5	5
AT2G18670	AT2G18700	6	6
AT3G27220	AT3G27260	6	7
AT1G44750	AT1G44790	6	9
AT1G69850	AT1G69870	8	9
AT4G08480	AT4G08500	7	7
AT3G16570	AT3G16630	9	8
AT5G39760	AT5G39785	8	5
AT5G46750	AT5G46800	9	9
AT5G16540	AT5G16570	7	6
AT3G22980	AT3G23020	6	6
AT4G11130	AT4G11150	5	9
AT2G24330	AT2G24360	7	9
AT3G58620	AT3G58650	7	7
AT3G16830	AT3G16850	8	8
AT2G32650	AT2G32700	9	6
AT2G32645	AT2G32700	7	6
AT3G23020	AT3G23050	6	9
AT2G36026	AT2G36070	6	8
AT2G36030	AT2G36070	5	8
AT5G21430	AT5G21900	9	5
AT5G21430	AT5G21910	9	8
AT4G02080	AT4G02120	9	8
AT1G68490	AT1G68530	9	9
AT3G18680	AT3G18730	9	5
AT5G11620	AT5G11670	5	9
AT1G22910	AT1G22940	6	8
AT3G53530	AT3G53570	7	6
AT5G47200	AT5G47250	9	5
AT5G06230	AT5G06260	5	8
AT1G11730	AT1G11780	5	7
AT4G25610	AT4G25650	5	9
AT4G25610	AT4G25660	5	8
AT2G23740	AT2G23770	6	5
AT2G23755	AT2G23770	6	5
AT1G56190	AT1G56230	9	6
AT5G55610	AT5G55670	7	7
AT1G80490	AT1G80530	7	8
AT5G35730	AT5G35750	8	7
AT2G28760	AT2G28790	5	9
AT2G28760	AT2G28800	5	9
AT5G43990	AT5G44030	5	6
AT2G15680	AT2G15730	5	6
AT2G15690	AT2G15730	8	6
AT1G17980	AT1G18040	7	7
AT2G17930	AT2G17970	7	5
AT5G45500	AT5G45520	7	5
AT2G36400	AT2G36430	8	8
AT4G22530	AT4G22550	6	7
AT3G61580	AT3G61630	9	6
AT1G29940	AT1G29965	8	9
AT4G17440	AT4G17480	5	5
AT1G31550	AT1G31600	6	6
AT5G64410	AT5G64440	7	8
AT5G26230	AT5G26240	7	8
AT4G40040	AT4G40070	9	5
AT2G20650	AT2G20690	5	9
AT5G25460	AT5G25510	9	8
AT3G47400	AT3G47460	5	6
AT5G19850	AT5G19900	8	8
AT3G12915	AT3G12950	6	8
AT3G22960	AT3G22980	9	6
AT3G26600	AT3G26618	6	8
AT5G21326	AT5G21900	9	5
AT5G21326	AT5G21910	9	8
AT4G22540	AT4G22560	7	6
AT2G20550	AT2G20585	5	6
AT1G18300	AT1G18360	6	8
AT2G46830	AT2G46890	5	7
AT5G64230	AT5G64280	6	8
AT4G20240	AT4G20270	5	8
AT2G40590	AT2G40650	9	8
AT5G22090	AT5G22120	9	8
AT3G48190	AT3G48195	6	6
AT1G13250	AT1G13280	8	9
AT2G15020	AT2G15042	6	5
AT2G21300	AT2G21340	7	8
AT4G25440	AT4G25515	7	6
AT4G21740	AT4G21770	6	8
AT2G20560	AT2G20590	5	6
AT3G18060	AT3G18110	9	8
AT1G17480	AT1G17520	6	7
AT3G62455	AT3G62500	5	5
AT2G41350	AT2G41380	7	6
AT1G16970	AT1G17020	7	5
AT4G10760	AT4G10790	8	8
AT1G80410	AT1G80460	9	8
AT2G14835	AT2G14850	7	6
AT5G09330	AT5G09380	7	7
AT5G03370	AT5G03415	8	6
AT1G79080	AT1G79120	8	5
AT3G66652	AT3G06660	5	7
AT1G67890	AT1G67930	7	8
AT5G45330	AT5G45360	6	8
AT4G02770	AT4G02790	9	9
AT1G18700	AT1G18730	6	9
AT1G18700	AT1G18735	6	5
AT1G30460	AT1G30480	7	7
AT4G24630	AT4G24680	7	8
AT2G04560	AT2G04620	5	6
AT2G36910	AT2G36960	9	5
AT4G39160	AT4G39200	6	9
AT4G34200	AT4G34250	9	8
AT5G05680	AT5G05730	6	8
AT1G63380	AT1G63430	5	6
AT4G13730	AT4G13770	6	9
AT4G34570	AT4G34610	7	7
AT1G10670	AT1G10700	9	8
AT5G16890	AT5G16930	7	7
AT5G16890	AT5G16940	7	6
AT5G61980	AT5G62030	5	7
AT5G61990	AT5G62030	6	7
AT3G06430	AT3G06450	9	7
AT4G29160	AT4G29210	8	7
AT3G16840	AT3G16860	8	5
AT2G43900	AT2G43945	6	9
AT1G09730	AT1G09795	6	9
AT1G09740	AT1G09795	7	9
AT3G55060	AT3G55110	6	6
AT4G34030	AT4G34070	8	8
AT4G34040	AT4G34070	8	8
AT5G23680	AT5G23730	7	5
AT3G18690	AT3G18730	6	5
AT1G27770	AT1G27840	7	6
AT1G69020	AT1G69060	5	6
AT3G12500	AT3G12560	5	7
AT3G12502	AT3G12560	5	7
AT5G23860	AT5G23900	8	9
AT3G47390	AT3G47450	6	8
AT4G16143	AT4G16155	8	9
AT1G01010	AT1G01040	5	6
AT5G22070	AT5G22100	8	8
AT5G28400	AT5G28430	6	5
AT5G52820	AT5G52860	8	6
AT1G09220	AT1G09280	5	7
AT3G44160	AT3G44200	8	7
AT3G63170	AT3G63210	9	8
AT4G11130	AT4G11160	5	8
AT4G30250	AT4G30310	5	8
AT1G22700	AT1G22730	9	8
AT1G22700	AT1G22740	9	7
AT1G10660	AT1G10700	6	8
AT5G05130	AT5G05170	5	9
AT2G20550	AT2G20590	5	6
AT2G37360	AT2G37390	5	6
AT2G37362	AT2G37390	5	6
AT4G01660	AT4G01690	8	9
AT4G01670	AT4G01690	7	9
AT4G38600	AT4G38640	8	8
AT1G31300	AT1G31330	7	9
AT1G29400	AT1G29470	8	9
AT4G02715	AT4G02750	8	6
AT1G69523	AT1G69550	8	7
AT1G17970	AT1G18040	7	7
AT1G03380	AT1G03457	7	5
AT4G36860	AT4G36890	7	7
AT4G36850	AT4G36880	5	5
AT5G43790	AT5G43810	6	7
AT3G44110	AT3G44160	9	8
AT1G48090	AT1G48110	7	7
AT4G28710	AT4G28730	7	9
AT5G11580	AT5G11620	9	5
AT2G01400	AT2G01440	7	7
AT2G01410	AT2G01440	7	7
AT2G38330	AT2G38410	9	7
AT5G24800	AT5G24850	7	7
AT3G43520	AT3G43528	9	5
AT5G06850	AT5G06940	6	5
AT5G06850	AT5G06950	6	5
AT4G31800	AT4G31850	6	9
AT4G32290	AT4G32330	7	8
AT5G44400	AT5G44420	8	5
AT2G18470	AT2G18500	5	5
AT4G14540	AT4G14570	9	8
AT3G15590	AT3G15620	8	5
AT3G15590	AT3G15630	8	8
AT1G73680	AT1G73720	7	8
AT2G18940	AT2G18960	9	9
AT3G10760	AT3G10840	8	9
AT1G60000	AT1G60030	9	5
AT4G16850	AT4G16890	6	9
AT4G16770	AT4G16800	7	8
AT1G07260	AT1G07320	5	9
AT4G11160	AT4G11190	8	6
AT5G47790	AT5G47830	7	6
AT3G26470	AT3G26500	5	5
AT3G54030	AT3G54100	7	6
AT1G53645	AT1G53700	8	5
AT3G23750	AT3G23790	8	6
AT4G27640	AT4G27680	8	8
AT3G02260	AT3G02280	7	7
AT3G46870	AT3G46920	8	6
AT1G44100	AT1G44125	8	5
AT1G44100	AT1G44120	8	5
AT1G26910	AT1G26940	8	7
[truncated: 128 more rows]

## Sheet: Expression level of all genes
AGI	expression level
AT1G01010	5
AT1G01020	6
AT1G01030	5
AT1G01040	6
AT1G01046	5
AT1G01050	9
AT1G01060	3
AT1G01070	5
AT1G01073	1
AT1G01080	9
AT1G01090	9
AT1G01100	9
AT1G01110	4
AT1G01115	1
AT1G01120	8
AT1G01130	5
AT1G01140	7
AT1G01150	4
AT1G01160	7
AT1G01170	9
AT1G01180	6
AT1G01183	1
AT1G01190	5
AT1G01200	5
AT1G01210	8
AT1G01220	8
AT1G01225	5
AT1G01230	8
AT1G01240	5
AT1G01250	5
AT1G01260	5
AT1G01270	1
AT1G01280	2
AT1G01290	6
AT1G01300	9
AT1G01305	2
AT1G01310	3
AT1G01320	9
AT1G01340	4
AT1G01350	8
AT1G01355	3
AT1G01360	7
AT1G01370	6
AT1G01380	5
AT1G01390	6
AT1G01400	2
AT1G01410	1
AT1G01420	7
AT1G01430	9
AT1G01440	7
AT1G01448	6
AT1G01450	5
AT1G01453	2
AT1G01460	3
AT1G01470	9
AT1G01471	5
AT1G01480	3
AT1G01490	8
AT1G01500	8
AT1G01510	8
AT1G01520	5
AT1G01530	3
AT1G01540	8
AT1G01550	9
AT1G01560	4
AT1G01570	5
AT1G01580	5
AT1G01590	4
AT1G01600	6
AT1G01610	9
AT1G01620	9
AT1G01630	9
AT1G01640	4
AT1G01650	7
AT1G01660	4
AT1G01670	4
AT1G01680	3
AT1G01690	6
AT1G01695	4
AT1G01700	5
AT1G01710	8
AT1G01720	8
AT1G01725	7
AT1G01730	8
AT1G01740	5
AT1G01750	5
AT1G01760	5
AT1G01770	7
AT1G01780	7
AT1G01790	9
AT1G01800	8
AT1G01810	4
AT1G01820	9
AT1G01830	5
AT1G01840	5
AT1G01860	8
AT1G01870	1
AT1G01880	5
AT1G01890	1
AT1G01900	6
AT1G01910	7
AT1G01920	6
AT1G01930	7
AT1G01940	8
AT1G01950	5
AT1G01960	8
AT1G01970	9
AT1G01980	2
AT1G01990	8
AT1G02000	6
AT1G02010	5
AT1G02020	6
AT1G02030	3
AT1G02040	2
AT1G02050	6
AT1G02060	6
AT1G02065	4
AT1G02070	4
AT1G02074	3
AT1G02080	7
AT1G02090	8
AT1G02100	6
AT1G02110	7
AT1G02120	9
AT1G02130	9
AT1G02136	1
AT1G02140	9
AT1G02145	6
AT1G02150	9
AT1G02160	8
AT1G02170	8
AT1G02180	6
AT1G02190	3
AT1G02205	7
AT1G02210	4
AT1G02220	5
AT1G02228	2
AT1G02230	4
AT1G02250	2
AT1G02260	7
AT1G02270	8
AT1G02280	9
AT1G02290	7
AT1G02300	8
AT1G02305	9
AT1G02310	4
AT1G02320	1
AT1G02330	8
AT1G02335	7
AT1G02340	4
AT1G02350	5
AT1G02360	6
AT1G02370	7
AT1G02380	5
AT1G02390	4
AT1G02391	2
AT1G02400	5
AT1G02405	3
AT1G02410	8
AT1G02420	6
AT1G02430	5
AT1G02440	2
AT1G02450	4
AT1G02460	5
AT1G02470	4
AT1G02475	9
AT1G02480	1
AT1G02490	4
AT1G02500	9
AT1G02510	3
AT1G02520	4
AT1G02530	3
AT1G02540	2
AT1G02550	3
AT1G02560	9
AT1G02570	4
AT1G02575	3
AT1G02580	2
AT1G02590	1
AT1G02600	1
AT1G02610	5
AT1G02620	2
AT1G02630	3
AT1G02640	6
AT1G02650	5
AT1G02660	5
AT1G02670	5
AT1G02680	7
AT1G02681	1
AT1G02690	7
AT1G02700	5
AT1G02710	7
AT1G02720	6
AT1G02730	8
AT1G02740	6
AT1G02750	6
AT1G02760	1
AT1G02770	4
AT1G02780	9
AT1G02790	3
AT1G02800	6
AT1G02810	4
AT1G02813	2
AT1G02816	7
AT1G02820	7
AT1G02830	2
AT1G02840	8
AT1G02850	5
AT1G02860	5
AT1G02870	9
AT1G02880	5
AT1G02890	8
AT1G02900	6
AT1G02910	9
AT1G02920	9
AT1G02930	9
AT1G02940	5
AT1G02950	5
AT1G02952	2
AT1G02960	5
AT1G02965	3
AT1G02970	6
AT1G02980	2
AT1G02990	5
AT1G03000	8
AT1G03010	3
AT1G03020	5
AT1G03022	1
AT1G03030	7
AT1G03040	8
AT1G03050	3
AT1G03055	6
AT1G03060	7
AT1G03070	4
AT1G03080	8
AT1G03090	6
AT1G03100	6
AT1G03103	3
AT1G03106	2
AT1G03110	8
AT1G03120	4
AT1G03130	9
AT1G03140	8
AT1G03150	8
AT1G03160	8
AT1G03170	4
AT1G03180	5
AT1G03190	5
AT1G03200	6
AT1G03210	7
AT1G03220	9
AT1G03230	8
AT1G03240	3
AT1G03250	8
AT1G03260	6
AT1G03270	6
AT1G03280	8
AT1G03290	6
AT1G03300	6
AT1G03310	8
AT1G03320	4
AT1G03330	9
AT1G03340	6
AT1G03350	8
AT1G03360	8
AT1G03365	7
AT1G03370	7
AT1G03380	7
AT1G03390	2
AT1G03400	7
AT1G03410	6
AT1G03420	7
AT1G03430	8
AT1G03440	7
AT1G03445	3
AT1G03457	5
AT1G03470	6
AT1G03475	9
AT1G03490	3
AT1G03495	7
AT1G03502	4
AT1G03506	1
AT1G03510	5
AT1G03515	1
AT1G03520	5
AT1G03530	7
AT1G03540	5
AT1G03550	6
AT1G03545	5
AT1G03560	6
AT1G03570	1
AT1G03580	4
AT1G03590	7
AT1G03600	9
AT1G03610	7
AT1G03620	5
AT1G03630	9
AT1G03640	1
AT1G03650	6
AT1G03660	5
AT1G03670	3
AT1G03680	9
AT1G03687	7
AT1G03700	3
AT1G03710	4
AT1G03720	2
AT1G03730	7
AT1G03740	7
AT1G03743	1
AT1G03746	1
AT1G03750	5
AT1G03760	7
AT1G03770	5
AT1G03780	5
AT1G03790	4
AT1G03800	4
AT1G03810	4
AT1G03820	8
AT1G03830	6
AT1G03840	4
AT1G03850	4
AT1G03860	8
AT1G03870	9
AT1G03880	2
AT1G03890	3
AT1G03900	9
AT1G03905	5
AT1G03910	8
AT1G03920	5
AT1G03930	8
AT1G03935	1
AT1G03940	8
AT1G03950	8
AT1G03960	6
AT1G03970	7
AT1G03980	5
AT1G03982	2
AT1G03990	5
AT1G04000	7
AT1G04010	6
AT1G04020	6
AT1G04030	6
AT1G04040	9
AT1G04050	5
AT1G04070	7
AT1G04080	8
AT1G04090	4
AT1G04100	5
AT1G04110	7
AT1G04120	7
AT1G04130	6
AT1G04140	8
AT1G04150	4
AT1G04160	6
AT1G04170	9
AT1G04171	1
AT1G04180	4
AT1G04190	8
AT1G04200	7
AT1G04210	8
AT1G04220	5
AT1G04230	7
AT1G04240	8
AT1G04250	8
AT1G04260	7
AT1G04270	9
AT1G04280	7
AT1G04290	8
AT1G04295	6
AT1G04300	6
AT1G04310	5
AT1G04320	1
AT1G04330	4
AT1G04340	8
AT1G04350	9
AT1G04360	5
AT1G04370	2
AT1G04380	3
AT1G04390	6
AT1G04400	9
AT1G04410	9
AT1G04420	9
AT1G04425	7
AT1G04430	9
AT1G04440	8
AT1G04445	1
AT1G04450	1
AT1G04457	1
AT1G04470	3
AT1G04480	9
AT1G04490	3
AT1G04500	4
AT1G04501	1
AT1G04510	8
AT1G04520	8
AT1G04530	8
AT1G04540	4
AT1G04550	6
AT1G04555	6
AT1G04560	3
AT1G04570	5
AT1G04580	2
AT1G04590	7
AT1G04600	4
AT1G04610	3
AT1G04620	9
AT1G04625	2
AT1G04630	9
AT1G04635	6
AT1G04640	9
AT1G04645	1
AT1G04650	5
AT1G04660	2
AT1G04670	4
AT1G04680	9
AT1G04684	1
AT1G04690	9
AT1G04700	4
AT1G04710	8
AT1G04720	1
AT1G04730	6
AT1G04750	9
AT1G04760	6
AT1G04770	8
AT1G04778	4
AT1G04780	8
AT1G04790	7
AT1G04800	9
AT1G04810	8
AT1G04820	9
AT1G04830	6
AT1G04840	5
AT1G04850	9
AT1G04860	8
AT1G04870	7
AT1G04880	4
AT1G04890	3
AT1G04900	7
AT1G04910	8
AT1G04920	5
AT1G04930	5
AT1G04940	9
AT1G04945	5
AT1G04950	6
AT1G04960	7
AT1G04970	7
AT1G04980	8
AT1G04985	8
AT1G04990	7
AT1G05000	6
AT1G05010	9
AT1G05020	4
AT1G05030	8
AT1G05040	3
AT1G05055	7
AT1G05060	8
AT1G05061	4
AT1G05065	6
AT1G05070	8
AT1G05080	3
AT1G05085	3
AT1G05090	6
AT1G05100	4
AT1G05120	7
AT1G05135	9
AT1G05136	1
AT1G05140	9
AT1G05150	8
AT1G05160	6
AT1G05170	6
AT1G05180	7
AT1G05190	9
AT1G05200	7
AT1G05205	8
AT1G05210	7
AT1G05220	2
AT1G05230	5
AT1G05240	4
AT1G05250	4
AT1G05260	6
AT1G05270	8
AT1G05280	4
AT1G05290	2
AT1G05291	2
AT1G05300	6
AT1G05310	5
AT1G05320	6
AT1G05330	2
AT1G05340	5
AT1G05350	8
AT1G05360	7
AT1G05370	5
AT1G05380	6
AT1G05385	9
AT1G05390	1
AT1G05400	4
AT1G05410	6
AT1G05420	5
AT1G05430	9
AT1G05440	5
AT1G05450	2
AT1G05460	7
AT1G05470	7
AT1G05490	4
AT1G05500	8
AT1G05510	4
AT1G05520	8
AT1G05530	3
AT1G05540	5
AT1G05550	2
AT1G05560	9
AT1G05562	8
AT1G05570	6
AT1G05575	5
AT1G05577	3
AT1G05580	3
AT1G05590	7
AT1G05600	5
AT1G05610	4
AT1G05615	1
AT1G05620	6
AT1G05630	5
AT1G05640	5
AT1G05650	3
AT1G05660	3
AT1G05670	5
AT1G05675	4
AT1G05680	6
AT1G05690	5
AT1G05700	4
AT1G05710	5
AT1G05720	8
AT1G05730	5
AT1G05740	4
AT1G05750	6
AT1G05760	5
AT1G05770	5
AT1G05780	7
AT1G05785	5
AT1G05790	6
AT1G05800	3
AT1G05805	8
AT1G05810	6
AT1G05820	4
AT1G05830	6
AT1G05835	8
AT1G05840	7
AT1G05850	9
AT1G05860	7
AT1G05870	6
AT1G05880	2
AT1G05890	7
AT1G05894	4
AT1G05900	6
AT1G05910	7
AT1G05920	2
AT1G05925	1
AT1G05930	4
AT1G05940	8
AT1G05950	6
AT1G05960	7
AT1G05970	6
AT1G05980	1
AT1G05990	2
AT1G06000	9
AT1G06002	9
AT1G06010	8
AT1G06020	3
AT1G06030	2
AT1G06040	9
AT1G06050	6
AT1G06060	8
AT1G06070	7
AT1G06080	6
AT1G06090	5
AT1G06100	7
AT1G06110	8
AT1G06120	4
AT1G06130	7
AT1G06135	1
AT1G06137	4
AT1G06140	5
AT1G06150	6
AT1G06149	6
AT1G06148	3
AT1G06160	6
AT1G06170	4
AT1G06180	7
AT1G06190	9
AT1G06200	9
AT1G06210	7
AT1G06220	8
AT1G06225	4
AT1G06230	7
AT1G06240	8
AT1G06250	5
AT1G06265	5
AT1G06260	5
AT1G06270	6
AT1G06280	4
AT1G06290	9
AT1G06310	2
AT1G06320	2
AT1G06330	1
AT1G06340	3
AT1G06350	5
AT1G06360	9
AT1G06370	5
AT1G06380	7
AT1G06390	8
AT1G06400	9
AT1G06410	9
AT1G06420	5
AT1G06430	9
AT1G06440	5
AT1G06450	6
AT1G06460	9
AT1G06470	7
AT1G06475	5
AT1G06480	1
AT1G06490	5
AT1G06500	5
AT1G06515	7
AT1G06510	8
AT1G06520	4
AT1G06530	9
AT1G06540	5
AT1G06550	9
AT1G06560	7
AT1G06570	7
AT1G06580	5
AT1G06590	6
AT1G06610	1
AT1G06620	5
AT1G06630	5
AT1G06640	8
AT1G06645	7
AT1G06650	8
AT1G06660	5
AT1G06670	8
AT1G06680	9
AT1G06690	9
AT1G06700	8
AT1G06710	6
AT1G06720	8
AT1G06730	7
AT1G06740	5
AT1G06750	4
AT1G06760	9
AT1G06770	5
AT1G06780	6
AT1G06790	7
AT1G06800	5
AT1G06810	2
AT1G06820	9
AT1G06830	8
AT1G06840	6
AT1G06850	6
AT1G06860	1
AT1G06870	8
AT1G06880	1
AT1G06890	8
AT1G06900	8
AT1G06910	6
AT1G06920	2
AT1G06923	3
AT1G06925	2
AT1G06930	3
AT1G06950	9
AT1G06960	6
AT1G06970	4
AT1G06980	6
AT1G06990	2
AT1G07000	6
AT1G07010	7
AT1G07020	8
AT1G07025	1
AT1G07030	8
AT1G07040	8
AT1G07050	9
AT1G07051	3
AT1G07060	4
AT1G07070	9
AT1G07080	9
AT1G07090	7
AT1G07100	1
AT1G07110	9
AT1G07119	5
AT1G07120	4
AT1G07128	5
AT1G07130	5
AT1G07135	7
AT1G07140	9
AT1G07150	4
AT1G07160	4
AT1G07170	7
AT1G07175	4
AT1G07180	8
AT1G07190	1
AT1G07200	5
AT1G07210	9
AT1G07220	7
AT1G07230	8
AT1G07240	7
AT1G07250	8
AT1G07260	5
AT1G07270	5
AT1G07280	8
AT1G07290	5
AT1G07300	6
AT1G07310	8
AT1G07320	9
AT1G07330	4
AT1G07340	2
AT1G07350	7
AT1G07360	9
AT1G07370	8
AT1G07380	6
AT1G07390	5
AT1G07400	5
AT1G07410	5
AT1G07420	8
AT1G07430	5
AT1G07440	9
AT1G07450	6
AT1G07460	1
AT1G07470	8
AT1G07473	4
AT1G07476	4
AT1G07480	7
AT1G07485	4
AT1G07490	5
AT1G07500	1
AT1G07510	8
AT1G07520	5
AT1G07530	7
AT1G07540	2
AT1G07550	3
AT1G07560	4
AT1G07570	5
AT1G07580	1
AT1G07590	9
AT1G07600	9
AT1G07610	9
AT1G07615	7
AT1G07620	4
AT1G07630	7
AT1G07640	7
AT1G07650	7
AT1G07645	2
AT1G07660	8
AT1G07670	8
AT1G07680	2
AT1G07690	3
AT1G07700	8
AT1G07705	7
AT1G07702	1
AT1G07710	4
AT1G07720	8
AT1G07725	5
AT1G07728	5
AT1G07740	5
AT1G07745	5
AT1G07747	1
AT1G07750	7
AT1G07760	1
AT1G07770	9
AT1G07780	6
AT1G07790	9
AT1G07795	1
AT1G07800	2
AT1G07810	8
AT1G07820	9
AT1G07830	8
AT1G07840	7
AT1G07850	3
AT1G07860	2
AT1G07870	5
AT1G07880	6
AT1G07885	1
AT1G07890	9
AT1G07900	4
AT1G07901	5
AT1G07910	6
AT1G07920	9
AT1G07930	9
AT1G07940	9
AT1G07950	8
AT1G07960	6
AT1G07970	7
AT1G07980	8
AT1G07985	4
AT1G07990	8
AT1G08000	6
AT1G08005	4
AT1G08010	7
AT1G08030	7
AT1G08032	1
AT1G08035	4
AT1G08040	7
AT1G08050	5
AT1G08060	5
AT1G08065	2
AT1G08070	5
AT1G08080	3
AT1G08090	5
AT1G08100	4
AT1G08105	4
AT1G08110	8
AT1G08115	5
AT1G08120	3
AT1G08125	6
AT1G08130	8
AT1G08135	2
AT1G08140	4
AT1G08150	2
AT1G08160	7
AT1G08165	5
AT1G08170	2
AT1G08180	6
AT1G08190	9
AT1G08200	9
AT1G08210	7
AT1G08220	6
AT1G08240	1
AT1G08250	7
AT1G08260	7
AT1G08270	5
AT1G08280	7
AT1G08290	5
AT1G08300	5
AT1G08310	5
AT1G08315	6
AT1G08320	4
AT1G08340	5
AT1G08350	5
AT1G08360	9
AT1G08370	8
AT1G08380	9
AT1G08390	7
AT1G08400	5
AT1G08410	8
AT1G08420	7
AT1G08430	4
AT1G08440	4
AT1G08450	8
AT1G08460	7
AT1G08465	8
AT1G08470	8
AT1G08480	9
AT1G08490	9
AT1G08500	5
AT1G08510	9
AT1G08520	9
AT1G08530	8
AT1G08540	9
AT1G08550	9
AT1G08560	9
AT1G08570	7
AT1G08580	9
AT1G08590	5
AT1G08592	5
AT1G08600	5
AT1G08610	7
AT1G08620	6
AT1G08630	3
AT1G08640	9
AT1G08650	8
AT1G08660	7
AT1G08670	4
AT1G08680	6
AT1G08695	1
AT1G08700	8
AT1G08710	6
AT1G08720	7
AT1G08730	4
AT1G08735	2
AT1G08740	2
AT1G08750	5
AT1G08760	7
AT1G08770	7
AT1G08780	8
AT1G08790	1
AT1G08800	5
AT1G08810	7
AT1G08820	7
AT1G08830	8
AT1G08840	5
AT1G08845	6
AT1G08860	4
AT1G08870	1
AT1G08880	9
AT1G08890	7
AT1G08900	6
AT1G08910	7
AT1G08920	5
AT1G08930	8
AT1G08940	6
AT1G08950	1
AT1G08960	7
AT1G08970	7
AT1G08980	9
AT1G08985	1
AT1G08990	4
AT1G09000	5
AT1G09010	9
AT1G09020	8
AT1G09026	1
AT1G09030	1
AT1G09040	5
AT1G09050	5
AT1G09060	6
AT1G09070	9
AT1G09080	4
AT1G09090	2
AT1G09100	7
AT1G09110	1
AT1G09130	9
AT1G09140	8
AT1G09150	9
AT1G09155	4
AT1G09157	4
AT1G09160	7
AT1G09170	4
AT1G09176	2
AT1G09180	4
AT1G09190	6
AT1G09195	5
AT1G09200	9
AT1G09210	9
AT1G09220	5
AT1G09230	7
AT1G09240	6
AT1G09245	1
AT1G09250	7
AT1G09260	3
AT1G09270	7
AT1G09280	7
AT1G09290	7
AT1G09300	6
AT1G09310	9
AT1G09320	6
AT1G09330	9
AT1G09340	9
AT1G09350	6
AT1G09360	1
AT1G09370	3
AT1G09380	2
AT1G09390	7
AT1G09400	3
AT1G09410	5
AT1G09415	8
AT1G09420	6
AT1G09421	5
AT1G09430	9
AT1G09440	7
AT1G09450	6
AT1G09460	5
AT1G09470	6
AT1G09480	5
AT1G09483	2
AT1G09486	5
AT1G09490	8
AT1G09500	5
AT1G09510	2
AT1G09520	7
AT1G09530	6
AT1G09540	3
AT1G09550	2
AT1G09560	8
AT1G09570	7
AT1G09575	5
AT1G09580	8
AT1G09590	9
AT1G09600	5
AT1G09610	4
AT1G09620	9
AT1G09625	1
AT1G09630	8
AT1G09640	9
AT1G09645	8
AT1G09650	4
AT1G09660	8
AT1G09665	3
AT1G09680	5
AT1G09690	9
AT1G09700	7
AT1G09710	5
AT1G09720	4
AT1G09730	6
AT1G09740	7
AT1G09750	9
AT1G09760	9
AT1G09770	9
AT1G09780	9
AT1G09790	1
AT1G09794	6
AT1G09795	9
AT1G09800	6
AT1G09810	7
AT1G09812	5
AT1G09815	8
AT1G09820	6
AT1G09830	8
AT1G09840	6
AT1G09850	8
AT1G09860	4
AT1G09870	8
AT1G09880	4
AT1G09890	5
AT1G09900	8
AT1G09910	7
AT1G09920	8
AT1G09930	2
AT1G09932	4
AT1G09935	1
AT1G09940	7
AT1G09950	4
AT1G09960	6
AT1G09970	8
AT1G09980	7
AT1G09995	5
AT1G10000	4
AT1G10010	1
AT1G10020	7
AT1G10030	8
AT1G10040	4
AT1G10050	5
AT1G10060	6
AT1G10070	4
AT1G10090	8
AT1G10095	5
AT1G10100	1
AT1G10110	4
AT1G10120	7
AT1G10130	8
AT1G10140	5
AT1G10150	7
AT1G10155	4
AT1G10160	5
AT1G10170	8
AT1G10180	7
AT1G10190	3
AT1G10200	9
AT1G10210	5
AT1G10220	3
AT1G10230	8
AT1G10240	6
AT1G10250	3
AT1G10260	4
AT1G10270	7
AT1G10280	6
AT1G10290	9
AT1G10300	4
AT1G10310	9
AT1G10320	7
AT1G10330	5
AT1G10340	4
AT1G10350	7
AT1G10360	9
AT1G10370	8
AT1G10380	7
AT1G10385	2
AT1G10390	8
AT1G10400	2
AT1G10410	8
AT1G10417	4
AT1G10419	1
AT1G10430	8
AT1G10440	1
AT1G10450	7
AT1G10455	4
AT1G10460	5
AT1G10470	9
AT1G10480	4
AT1G10490	8
AT1G10500	9
AT1G10510	9
AT1G10520	5
AT1G10522	9
AT1G10530	4
AT1G10538	1
AT1G10540	4
AT1G10550	4
AT1G10560	4
AT1G10570	6
AT1G10580	8
AT1G10585	4
AT1G10586	1
AT1G10588	1
AT1G10590	9
AT1G10600	7
AT1G10610	6
AT1G10620	2
AT1G10630	9
AT1G10640	7
AT1G10650	6
AT1G10652	1
AT1G10657	5
AT1G10660	6
AT1G10670	9
AT1G10680	2
AT1G10682	8
AT1G10690	5
AT1G10700	8
AT1G10705	4
AT1G10710	3
AT1G10717	3
AT1G10720	7
AT1G10730	6
AT1G10740	5
AT1G10745	1
AT1G10747	2
AT1G10750	5
AT1G10760	9
AT1G10770	5
AT1G10780	7
AT1G10790	4
AT1G10800	4
AT1G10810	4
AT1G10820	6
AT1G10830	8
AT1G10840	9
AT1G10850	7
AT1G10865	7
AT1G10870	7
AT1G10880	2
AT1G10890	8
AT1G10900	8
AT1G10910	9
AT1G10920	5
AT1G10930	8
AT1G10940	8
AT1G10950	9
AT1G10960	9
AT1G10970	5
AT1G10980	3
AT1G10990	5
AT1G11000	6
AT1G11010	1
AT1G11020	7
AT1G11030	1
AT1G11040	2
AT1G11050	6
AT1G11055	3
AT1G11060	6
AT1G11070	4
AT1G11080	4
AT1G11090	7
AT1G11100	3
AT1G11110	2
AT1G11112	5
AT1G11120	5
AT1G11125	5
AT1G11130	8
AT1G11145	1
AT1G11150	5
AT1G11160	5
AT1G11170	5
AT1G11175	6
AT1G11180	7
AT1G11185	4
AT1G11190	5
AT1G11200	8
AT1G11210	8
AT1G11220	6
AT1G11230	3
AT1G11240	9
AT1G11250	3
AT1G11260	8
AT1G11265	3
AT1G11270	5
AT1G11280	5
AT1G11290	6
AT1G11300	6
AT1G11310	9
AT1G11320	6
AT1G11330	6
AT1G11340	5
AT1G11350	8
AT1G11360	6
AT1G11362	2
AT1G11370	3
AT1G11380	6
AT1G11390	7
AT1G11400	6
AT1G11410	7
AT1G11420	5
AT1G11430	9
AT1G11440	7
AT1G11450	5
AT1G11460	4
AT1G11470	3
AT1G11475	9
AT1G11480	7
AT1G11482	2
AT1G11490	3
AT1G11500	4
AT1G11510	1
AT1G11520	1
AT1G11530	9
AT1G11540	4
AT1G11545	8
AT1G11550	1
AT1G11560	2
AT1G11570	4
AT1G11572	2
AT1G11580	8
AT1G11590	3
AT1G11592	6
AT1G11593	2
AT1G11595	3
AT1G11600	8
AT1G11608	3
AT1G11610	2
AT1G11620	3
AT1G11630	7
AT1G11640	1
AT1G11650	9
AT1G11655	2
AT1G11660	8
AT1G11670	7
AT1G11680	9
AT1G11684	1
AT1G11690	4
AT1G11700	8
AT1G11710	5
AT1G11720	8
AT1G11730	5
AT1G11735	3
AT1G11740	4
AT1G11750	9
AT1G11755	7
AT1G11760	6
AT1G11765	1
AT1G11770	2
AT1G11780	7
AT1G11785	4
AT1G11790	8
AT1G11800	6
AT1G11803	4
AT1G11806	4
AT1G11810	2
AT1G11820	8
AT1G11840	9
AT1G11850	7
AT1G11860	9
AT1G11870	7
AT1G11880	6
AT1G11890	9
AT1G11900	6
AT1G11905	6
AT1G11910	9
AT1G11915	4
AT1G11920	2
AT1G11925	2
AT1G11930	8
AT1G11940	6
AT1G11950	6
AT1G11960	7
AT1G11970	4
AT1G11980	1
AT1G11990	4
AT1G12000	9
AT1G12010	5
AT1G12013	4
AT1G12015	1
AT1G12020	8
AT1G12030	6
AT1G12040	3
AT1G12050	9
AT1G12060	6
AT1G12064	2
AT1G12070	4
AT1G12080	5
AT1G12090	9
AT1G12100	5
AT1G12110	9
AT1G12120	9
AT1G12130	2
AT1G12140	7
AT1G12150	4
AT1G12160	4
AT1G12170	2
AT1G12180	2
AT1G12190	3
AT1G12200	7
AT1G12210	5
AT1G12211	1
AT1G12220	5
AT1G12230	9
AT1G12240	9
AT1G12244	7
AT1G12250	8
AT1G12260	5
AT1G12270	9
AT1G12280	6
AT1G12290	4
AT1G12294	3
AT1G12300	5
AT1G12310	9
AT1G12320	6
AT1G12330	8
AT1G12340	5
AT1G12350	8
AT1G12360	8
AT1G12370	5
AT1G12380	6
AT1G12390	7
AT1G12400	7
AT1G12410	9
AT1G12411	1
AT1G12420	6
AT1G12423	1
AT1G12430	7
AT1G12440	9
AT1G12450	6
AT1G12451	1
AT1G12460	7
AT1G12470	8
AT1G12480	6
AT1G12490	3
AT1G12500	8
AT1G12510	1
AT1G12520	6
AT1G12530	8
AT1G12540	2
AT1G12550	6
AT1G12560	4
AT1G12570	5
AT1G12580	7
AT1G12590	1
AT1G12600	4
AT1G12610	2
AT1G12620	6
AT1G12630	4
AT1G12640	8
AT1G12650	6
AT1G12660	2
AT1G12663	2
AT1G12665	1
AT1G12667	1
AT1G12669	2
AT1G12670	3
AT1G12672	3
AT1G12680	7
AT1G12700	5
AT1G12710	8
AT1G12720	3
AT1G12725	1
AT1G12730	6
AT1G12740	3
AT1G12750	6
AT1G12760	7
AT1G12770	9
AT1G12775	6
AT1G12780	8
AT1G12790	5
AT1G12800	9
AT1G12805	4
AT1G12810	7
AT1G12820	8
AT1G12830	8
AT1G12840	9
AT1G12845	9
AT1G12850	8
AT1G12855	3
AT1G12860	9
AT1G12870	2
AT1G12880	7
AT1G12890	2
AT1G12900	9
AT1G12910	8
AT1G12920	9
AT1G12930	7
AT1G12935	1
AT1G12938	1
AT1G12940	2
AT1G12950	4
AT1G12960	1
AT1G12970	6
AT1G12980	4
AT1G12990	7
AT1G13000	6
AT1G13010	1
AT1G13020	8
AT1G13030	7
AT1G13040	6
AT1G13050	5
AT1G13060	9
AT1G13070	4
AT1G13080	5
AT1G13090	9
AT1G13100	6
AT1G13110	9
AT1G13120	7
AT1G13130	5
AT1G13140	4
AT1G13145	6
AT1G13150	4
AT1G13160	8
AT1G13170	7
AT1G13180	6
AT1G13190	8
AT1G13195	5
AT1G13200	2
AT1G13210	8
AT1G13220	6
AT1G13230	4
AT1G13240	1
AT1G13245	9
AT1G13250	8
AT1G13260	7
AT1G13270	9
AT1G13280	9
AT1G13290	2
AT1G13300	5
AT1G13310	3
AT1G13320	8
AT1G13330	6
AT1G13340	4
AT1G13350	7
AT1G13360	8
AT1G13370	4
AT1G13380	8
AT1G13390	7
AT1G13400	4
AT1G13410	5
AT1G13420	5
AT1G13430	4
AT1G13440	9
AT1G13448	5
AT1G13450	6
AT1G13460	6
AT1G13470	5
AT1G13480	3
AT1G13485	1
AT1G13490	4
AT1G13500	3
AT1G13510	3
AT1G13520	4
AT1G13530	3
AT1G13540	4
AT1G13550	4
AT1G13560	8
AT1G13570	7
AT1G13580	5
AT1G13590	4
AT1G13600	4
AT1G13605	3
AT1G13607	5
AT1G13608	5
AT1G13609	9
AT1G13610	4
AT1G13620	2
AT1G13630	5
AT1G13635	3
AT1G13640	8
AT1G13650	7
AT1G13660	2
AT1G13670	5
AT1G13680	2
AT1G13690	8
AT1G13700	5
AT1G13710	6
AT1G13720	1
AT1G13730	9
AT1G13740	7
AT1G13750	6
AT1G13755	4
AT1G13760	3
AT1G13770	6
AT1G13780	6
AT1G13790	6
AT1G13800	5
AT1G13810	7
AT1G13820	9
AT1G13830	4
AT1G13840	1
AT1G13850	1
AT1G13860	5
AT1G13870	8
AT1G13880	8
AT1G13890	2
AT1G13900	7
AT1G13910	6
AT1G13920	6
AT1G13930	9
AT1G13940	6
AT1G13950	7
AT1G13960	6
AT1G13970	5
AT1G13980	6
AT1G13990	8
AT1G14000	9
AT1G14010	8
AT1G14020	7
AT1G14030	9
AT1G14040	6
AT1G14048	1
AT1G14060	8
AT1G14070	6
AT1G14071	1
AT1G14080	4
AT1G14090	5
AT1G14100	4
AT1G14110	3
AT1G14120	5
AT1G14130	6
AT1G14140	7
AT1G14150	9
AT1G14160	3
AT1G14170	5
AT1G14180	6
AT1G14182	1
AT1G14185	4
AT1G14190	5
AT1G14200	6
AT1G14205	7
AT1G14210	8
AT1G14220	3
AT1G14225	1
AT1G14230	7
AT1G14240	4
AT1G14250	9
AT1G14260	4
AT1G14270	8
AT1G14280	7
AT1G14290	8
AT1G14300	7
AT1G14310	8
AT1G14315	1
AT1G14320	9
AT1G14330	6
AT1G14340	7
AT1G14345	9
AT1G14350	6
AT1G14360	8
AT1G14370	6
AT1G14380	7
AT1G14390	4
AT1G14400	9
AT1G14410	9
AT1G14420	3
AT1G14430	6
AT1G14440	7
AT1G14450	9
AT1G14455	3
AT1G14460	7
AT1G14470	5
AT1G14480	5
AT1G14490	5
AT1G14500	3
AT1G14510	9
AT1G14518	1
AT1G14520	5
AT1G14530	5
AT1G14540	3
AT1G14549	1
AT1G14550	2
AT1G14560	7
AT1G14570	7
AT1G14580	7
AT1G14590	7
AT1G14600	6
AT1G14610	9
AT1G14620	8
AT1G14630	6
AT1G14640	5
AT1G14642	3
AT1G14650	8
AT1G14660	5
AT1G14670	9
AT1G14680	5
AT1G14685	7
AT1G14686	4
AT1G14687	5
AT1G14688	2
AT1G14690	7
AT1G14700	7
AT1G14710	8
AT1G14720	9
AT1G14730	5
AT1G14740	8
AT1G14750	4
AT1G14755	4
AT1G14760	3
AT1G14770	5
AT1G14780	4
AT1G14790	5
AT1G14800	2
AT1G14810	9
AT1G14820	6
AT1G14830	9
AT1G14840	7
AT1G14850	7
AT1G14860	5
AT1G14870	6
AT1G14880	5
AT1G14890	7
AT1G14900	8
AT1G14910	8
AT1G14920	8
AT1G14930	4
AT1G14940	1
AT1G14950	4
AT1G14960	4
AT1G14970	6
AT1G14980	9
AT1G14990	7
AT1G15000	7
AT1G15002	4
AT1G15010	4
AT1G15015	3
AT1G15020	6
AT1G15030	8
AT1G15040	4
AT1G15045	1
AT1G15050	4
AT1G15060	7
AT1G15080	6
AT1G15090	1
AT1G15100	7
AT1G15110	5
AT1G15120	9
AT1G15125	8
AT1G15130	8
AT1G15140	9
AT1G15150	5
AT1G15160	5
AT1G15165	6
AT1G15170	7
AT1G15175	6
AT1G15180	8
AT1G15190	4
AT1G15200	7
AT1G15210	5
AT1G15215	5
AT1G15220	5
AT1G15230	8
AT1G15240	6
AT1G15250	9
AT1G15260	9
AT1G15270	9
AT1G15280	8
AT1G15290	9
AT1G15300	5
AT1G15310	6
AT1G15320	3
AT1G15330	4
AT1G15340	9
AT1G15350	6
AT1G15360	2
AT1G15370	9
AT1G15380	4
AT1G15385	4
AT1G15390	9
AT1G15400	7
AT1G15405	6
AT1G15410	7
AT1G15415	4
AT1G15420	8
AT1G15430	6
AT1G15440	7
AT1G15450	1
AT1G15460	3
AT1G15470	8
AT1G15480	7
AT1G15490	6
AT1G15500	9
AT1G15510	7
AT1G15520	4
AT1G15530	6
AT1G15540	2
AT1G15550	7
AT1G15560	4
AT1G15570	7
AT1G15580	5
AT1G15590	3
AT1G15600	1
AT1G15610	1
AT1G15620	2
AT1G15630	3
AT1G15640	3
AT1G15650	1
AT1G15660	7
AT1G15670	6
AT1G15680	2
AT1G15690	9
AT1G15700	6
AT1G15710	8
AT1G15720	5
AT1G15730	9
AT1G15740	8
AT1G15750	7
AT1G15757	3
AT1G15760	5
AT1G15770	2
AT1G15772	3
AT1G15780	8
AT1G15790	5
AT1G15800	6
AT1G15810	8
AT1G15820	9
AT1G15825	5
AT1G15830	5
AT1G15840	1
AT1G15850	1
AT1G15860	7
AT1G15870	6
AT1G15880	8
AT1G15885	6
AT1G15890	5
AT1G15900	4
AT1G15910	7
AT1G15920	6
AT1G15930	9
AT1G15940	8
AT1G15950	8
AT1G15960	7
AT1G15970	7
AT1G15980	9
AT1G15990	3
AT1G16000	9
AT1G16010	7
AT1G16020	7
AT1G16022	5
AT1G16025	3
AT1G16030	5
AT1G16040	7
AT1G16060	5
AT1G16070	5
AT1G16080	9
AT1G16090	5
AT1G16100	1
AT1G16110	6
AT1G16120	3
AT1G16130	4
AT1G16140	3
AT1G16150	4
AT1G16160	3
AT1G16170	8
AT1G16180	9
AT1G16190	8
AT1G16210	9
AT1G16220	6
AT1G16225	2
AT1G16230	1
AT1G16240	7
AT1G16250	6
AT1G16260	5
AT1G16270	6
AT1G16280	8
AT1G16290	2
AT1G16300	6
AT1G16310	5
AT1G16320	9
AT1G16330	6
AT1G16340	6
AT1G16350	9
AT1G16360	3
AT1G16370	4
AT1G16380	3
AT1G16390	6
AT1G16400	7
AT1G16410	9
AT1G16420	3
AT1G16430	7
AT1G16440	3
AT1G16445	7
AT1G16450	1
AT1G16460	7
AT1G16470	9
AT1G16480	4
AT1G16489	5
AT1G16490	5
AT1G16500	6
AT1G16510	5
AT1G16515	5
AT1G16520	8
AT1G16530	5
AT1G16540	6
AT1G16550	5
AT1G16560	7
AT1G16570	6
AT1G16590	6
AT1G16600	2
AT1G16610	8
AT1G16620	4
AT1G16630	6
AT1G16635	5
AT1G16640	5
AT1G16650	6
AT1G16660	2
AT1G16670	6
AT1G16680	8
AT1G16690	6
AT1G16700	9
AT1G16705	4
AT1G16710	6
AT1G16720	9
AT1G16730	6
AT1G16740	9
AT1G16750	7
AT1G16760	2
AT1G16770	3
AT1G16780	7
AT1G16790	8
AT1G16800	5
AT1G16810	9
AT1G16820	5
AT1G16825	6
AT1G16830	5
AT1G16840	7
AT1G16850	6
AT1G16858	7
AT1G16860	7
AT1G16870	8
AT1G16880	9
AT1G16890	8
AT1G16900	7
AT1G16905	3
AT1G16910	4
AT1G16916	8
AT1G16920	9
AT1G16930	6
AT1G16940	3
AT1G16950	1
AT1G16960	8
AT1G16970	7
AT1G16980	2
AT1G17000	3
AT1G17010	1
AT1G17020	5
AT1G17030	4
AT1G17040	5
AT1G17050	8
AT1G17060	5
AT1G17070	6
AT1G17080	9
AT1G17090	6
AT1G17100	9
AT1G17110	7
AT1G17120	7
AT1G17130	8
AT1G17140	8
AT1G17145	7
AT1G17147	5
AT1G17150	2
AT1G17160	7
AT1G17170	7
AT1G17180	5
AT1G17190	7
AT1G17200	9
AT1G17210	8
AT1G17220	9
AT1G17230	6
AT1G17232	5
AT1G17235	4
AT1G17240	4
AT1G17255	5
AT1G17250	5
AT1G17260	5
AT1G17270	5
AT1G17275	2
AT1G17277	4
AT1G17280	8
AT1G17285	4
AT1G17290	9
AT1G17300	4
AT1G17310	1
AT1G17330	7
AT1G17340	6
AT1G17345	4
AT1G17350	6
AT1G17360	8
AT1G17370	8
AT1G17380	5
AT1G17390	4
AT1G17400	3
AT1G17410	5
AT1G17420	6
AT1G17430	6
AT1G17440	7
AT1G17450	5
AT1G17455	7
AT1G17460	6
AT1G17470	8
AT1G17480	6
AT1G17490	8
AT1G17495	2
AT1G17500	7
AT1G17510	8
AT1G17520	7
AT1G17530	8
AT1G17540	3
AT1G17545	1
AT1G17550	8
AT1G17560	8
AT1G17570	1
AT1G17580	7
AT1G17590	5
AT1G17600	5
AT1G17610	5
AT1G17615	2
AT1G17620	8
AT1G17630	5
AT1G17640	6
AT1G17650	9
AT1G17665	8
AT1G17660	1
AT1G17670	1
AT1G17680	6
AT1G17690	8
AT1G17700	5
AT1G17710	6
AT1G17720	8
AT1G17730	8
AT1G17744	6
AT1G17745	7
AT1G17750	5
AT1G17760	7
AT1G17770	2
AT1G17780	5
AT1G17790	6
AT1G17800	2
AT1G17810	2
AT1G17820	6
AT1G17830	6
AT1G17840	9
AT1G17850	8
AT1G17860	9
AT1G17870	5
AT1G17880	9
AT1G17890	7
AT1G17900	2
AT1G17910	3
AT1G17920	6
AT1G17930	6
AT1G17940	7
AT1G17950	4
AT1G17960	4
AT1G17970	7
AT1G17980	7
AT1G17990	5
AT1G18000	7
AT1G18010	7
AT1G18020	6
AT1G18030	6
AT1G18040	7
AT1G18050	1
AT1G18060	9
AT1G18070	9
AT1G18075	5
AT1G18080	9
AT1G18090	6
AT1G18100	5
AT1G18120	4
AT1G18130	1
AT1G18140	5
AT1G18150	8
AT1G18160	8
AT1G18170	9
AT1G18180	5
AT1G18190	7
AT1G18191	1
AT1G18200	5
AT1G18210	8
AT1G18220	1
AT1G18230	4
AT1G18240	3
AT1G18250	8
AT1G18260	8
AT1G18265	7
AT1G18270	6
AT1G18280	3
AT1G18290	4
AT1G18300	6
AT1G18310	2
AT1G18320	6
AT1G18330	7
AT1G18335	7
AT1G18340	7
AT1G18350	4
AT1G18360	8
AT1G18370	8
AT1G18390	5
AT1G18382	4
AT1G18400	7
AT1G18410	3
AT1G18415	6
AT1G18420	5
AT1G18430	1
AT1G18440	8
AT1G18450	8
AT1G18460	7
AT1G18470	7
AT1G18480	8
AT1G18485	7
[truncated: 31,270 more rows]
